# Supplementary material for: SLEPR: A Sample-Level Enrichment-Based Pathway Ranking Method — Seeking Biological Themes through Pathway-Level Consistency
Source: PubMed Central journal article supplement (PMC2546449; doi:10.1371/journal.pone.0003288), 2008-09-26

Distribution of SLEPR pathway ranking scores vs gene set sizes for data in TableS2

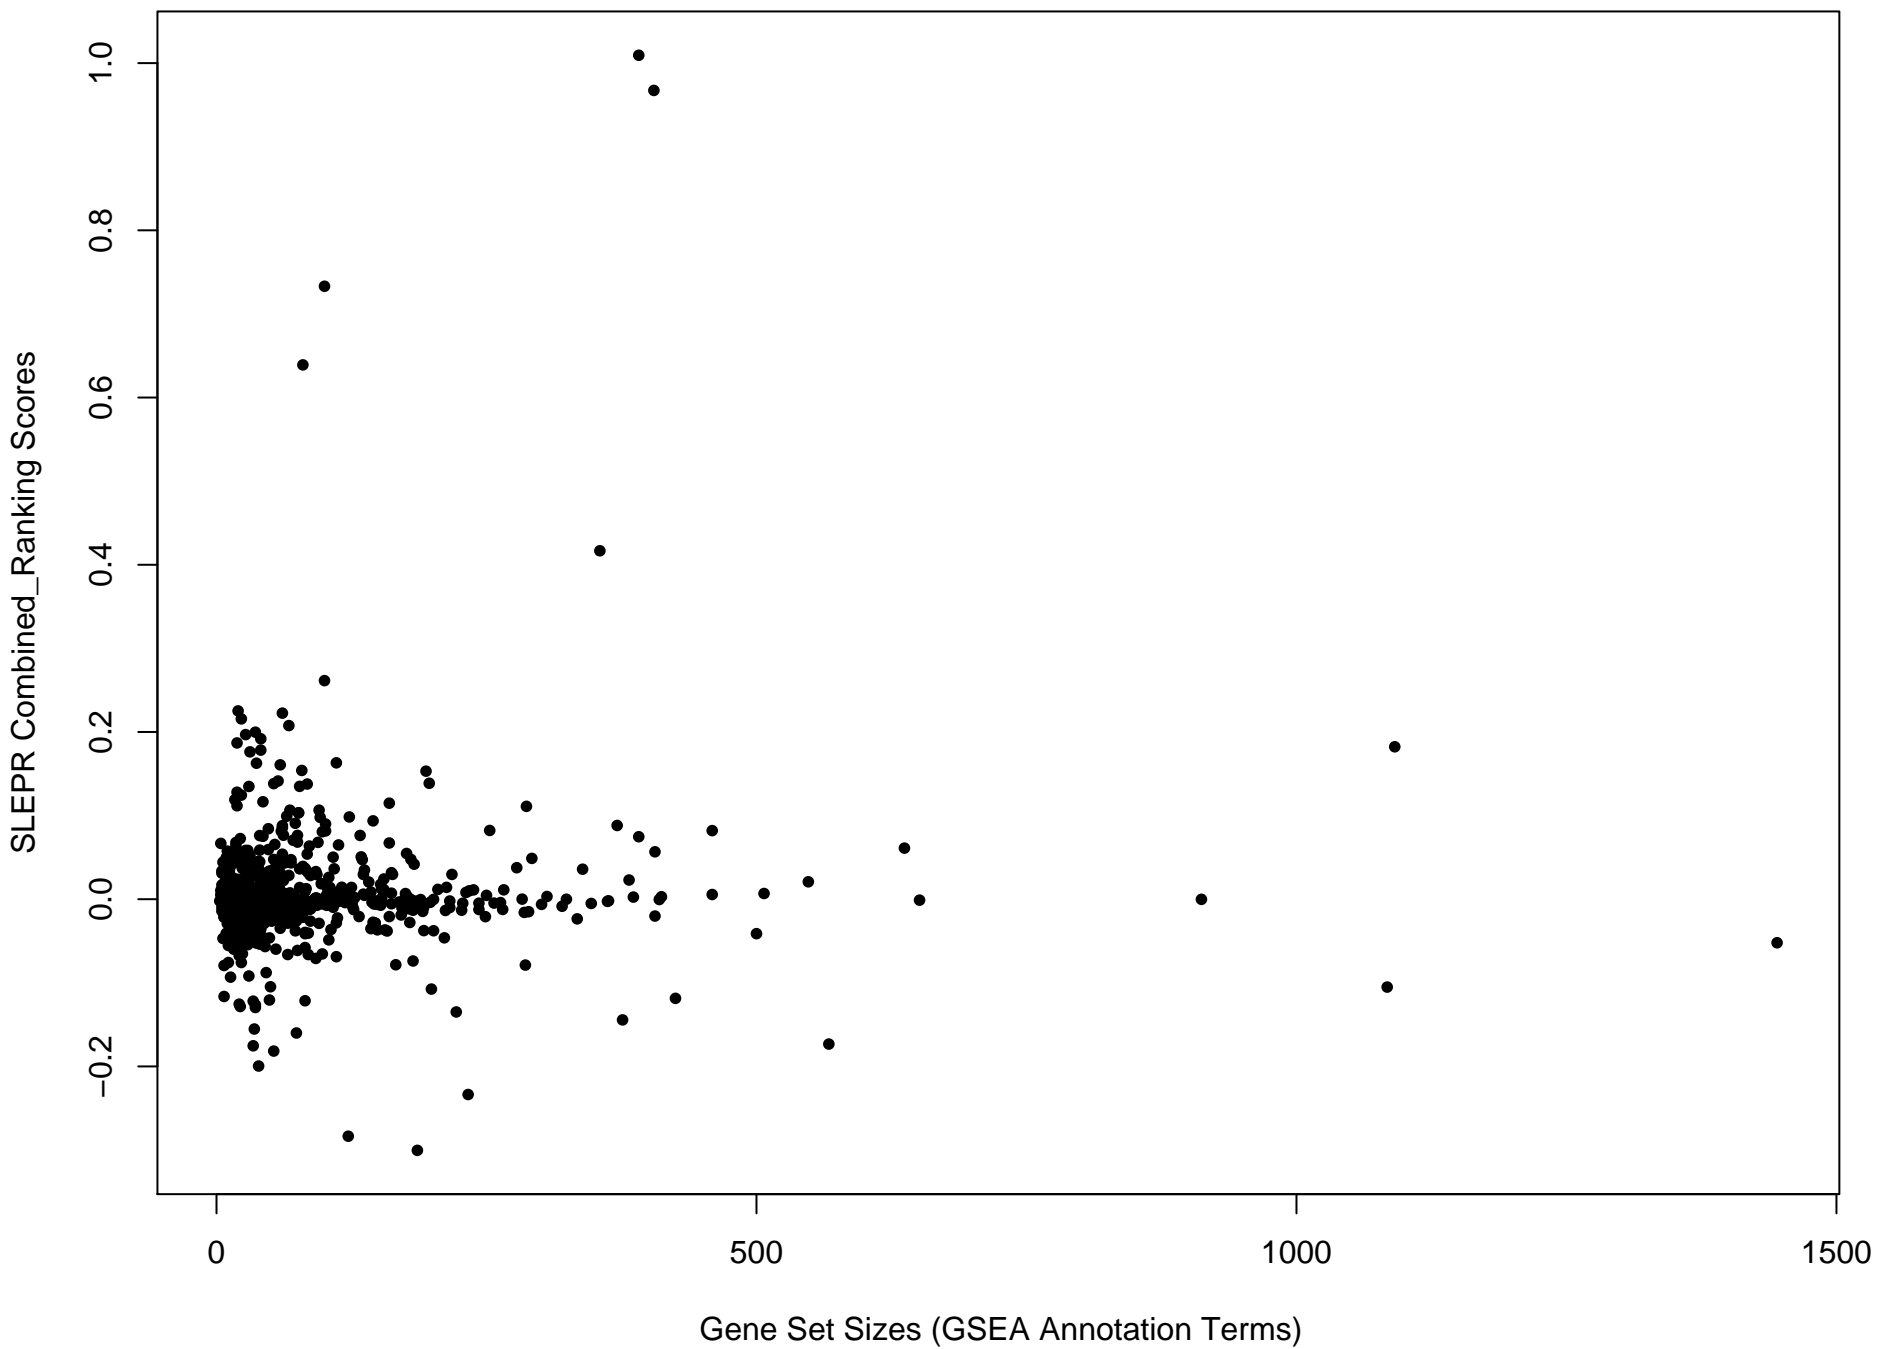

Distribution of SLEPR pathway ranking scores vs gene set sizes for data in TableS2 (size: 0–500)

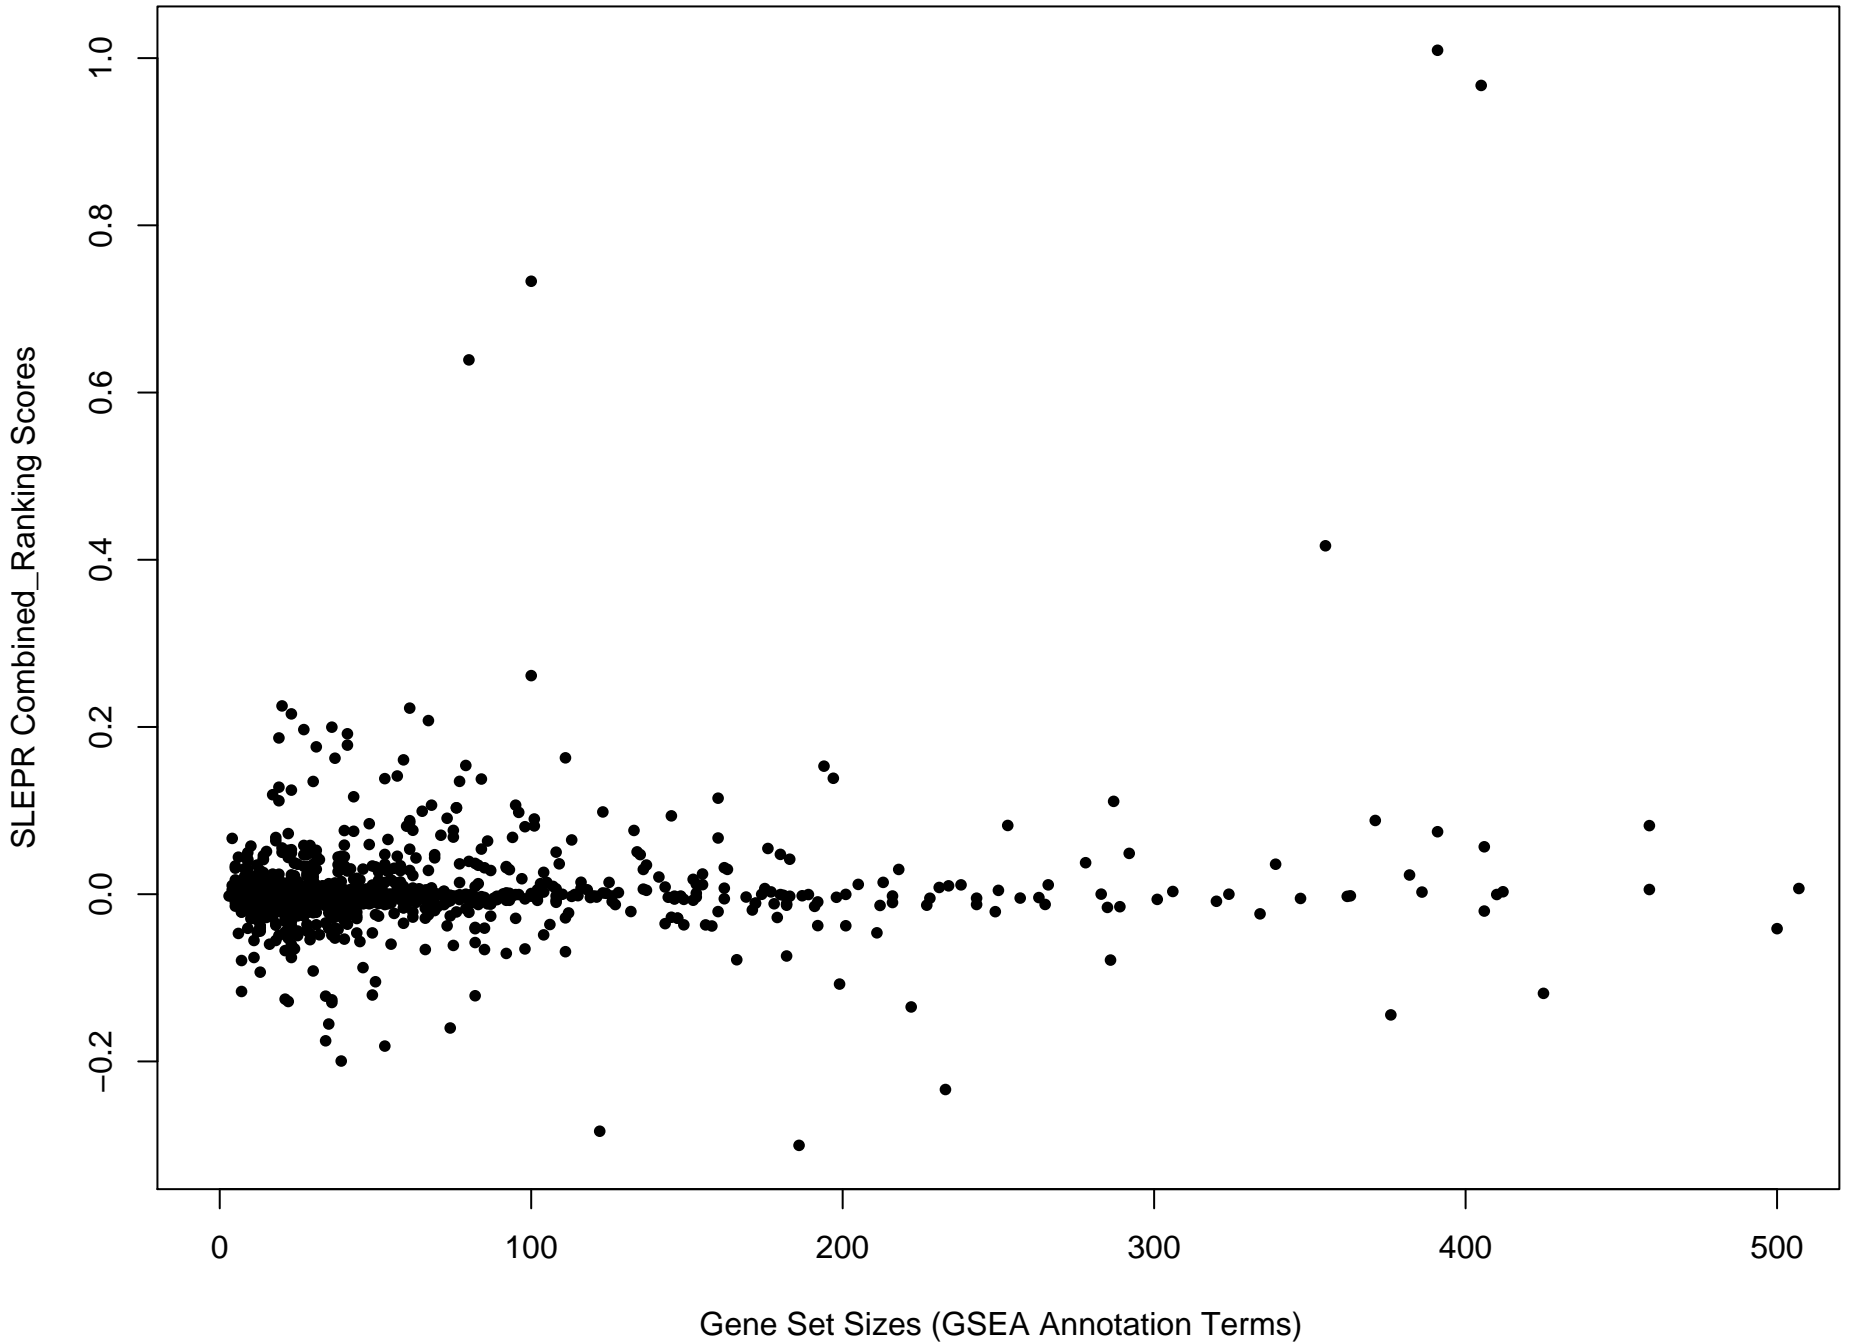

Distribution of SLEPR pathway ranking scores vs gene set sizes for data in TableS2 (size: 0–200)

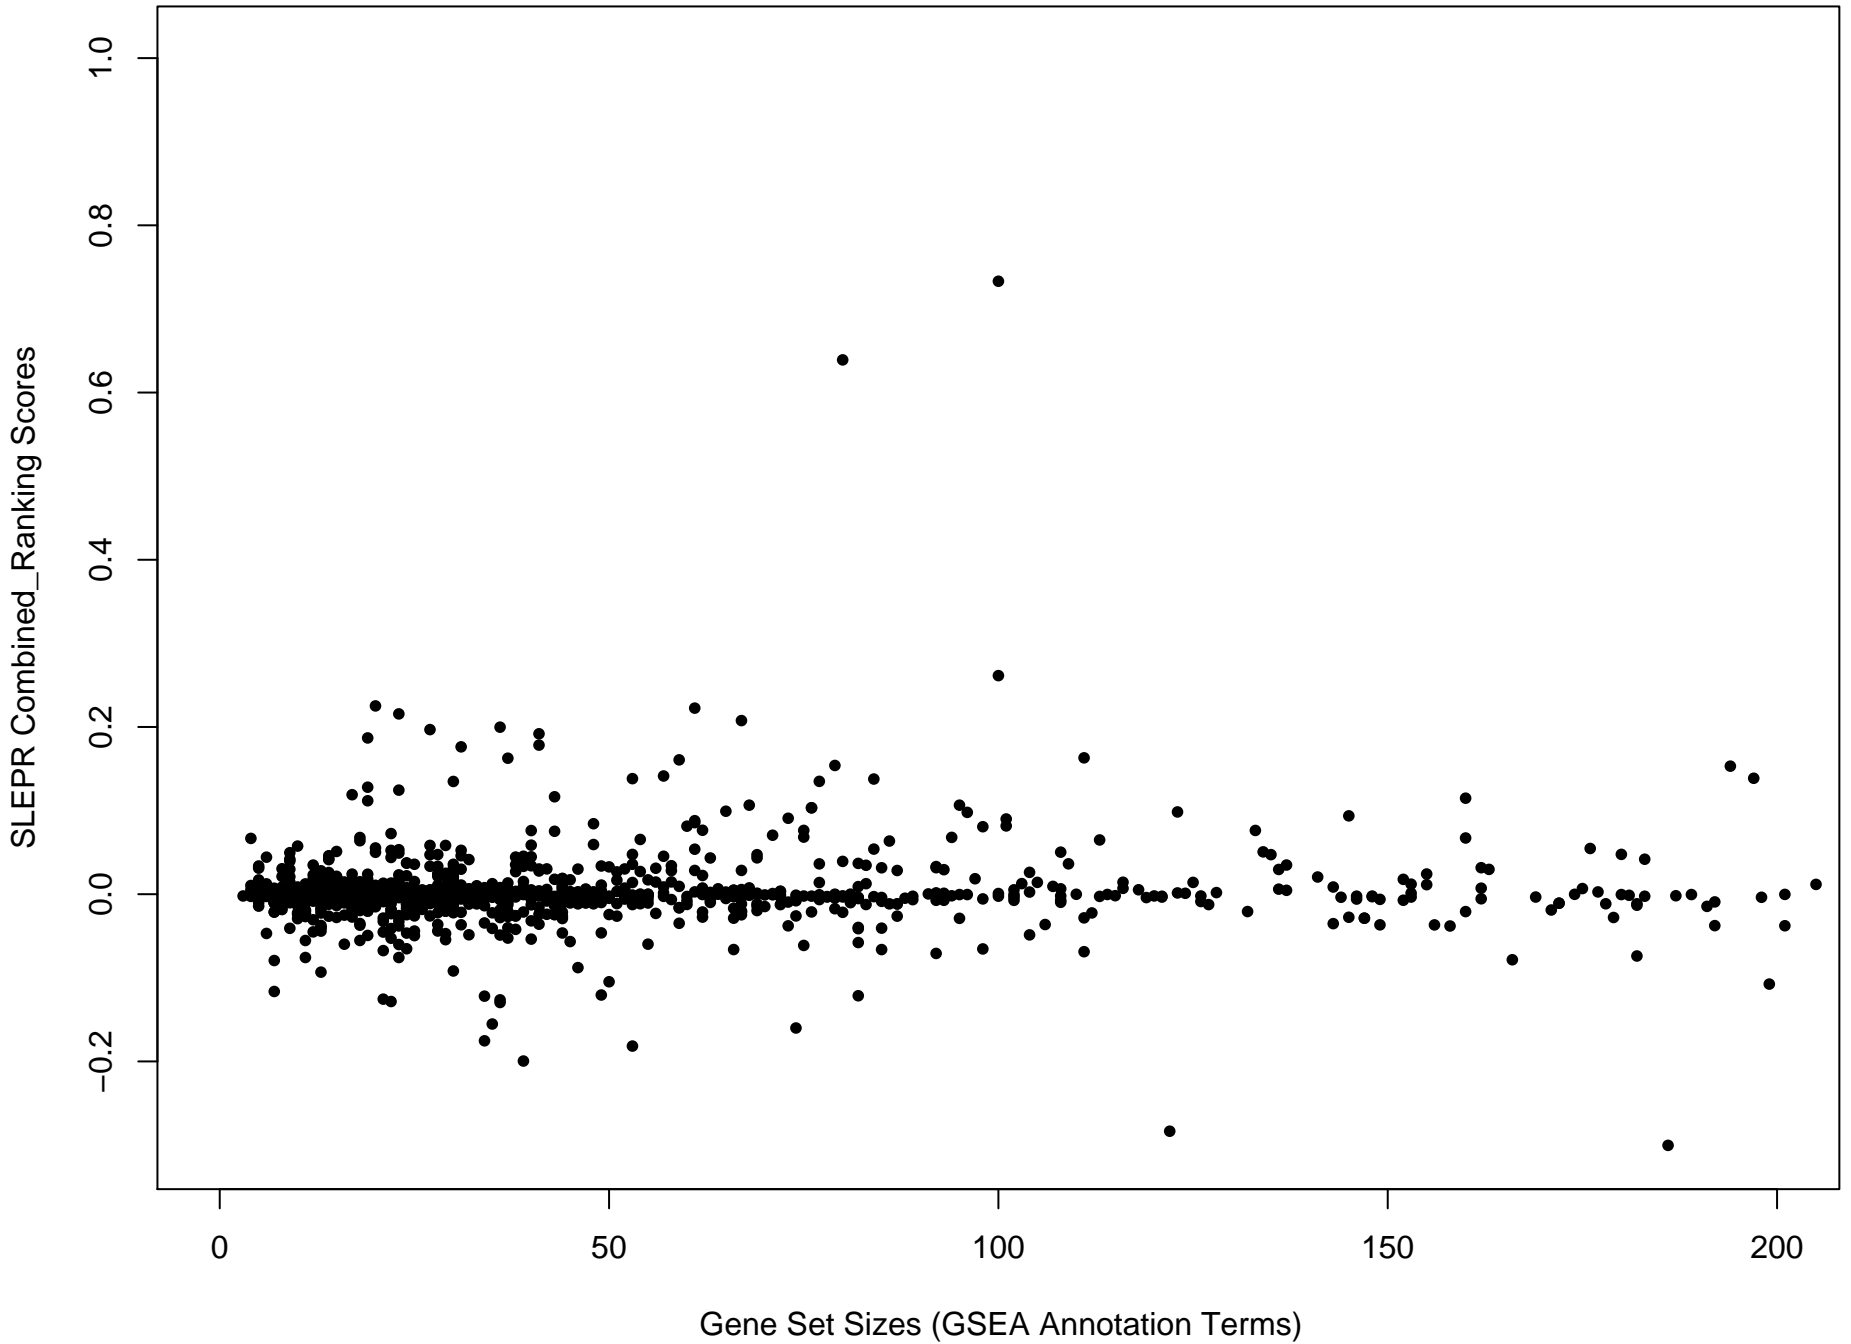

Histogram distribution of gene set sizes for terms in TableS2

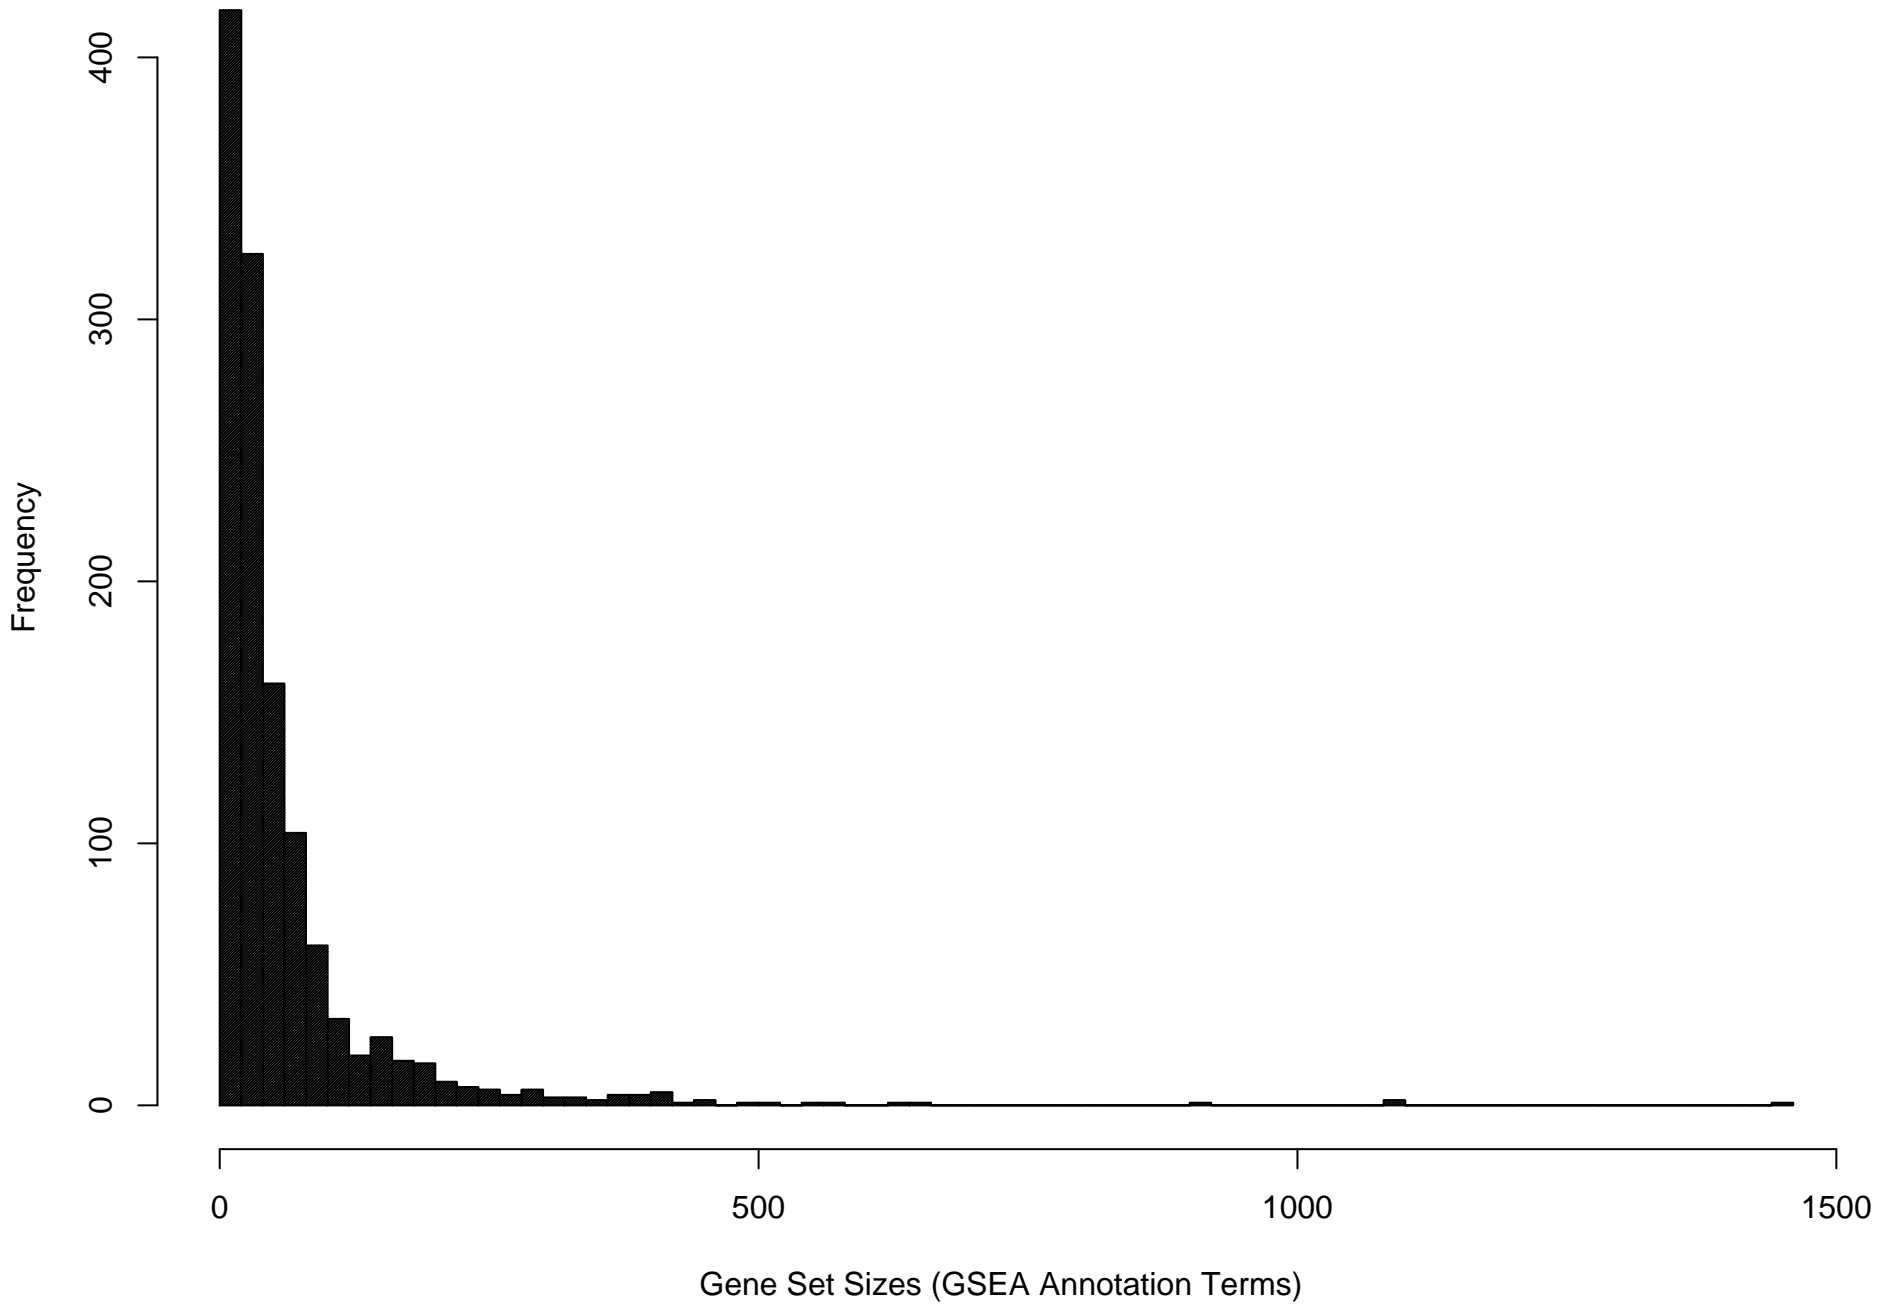

**Histogram distribution of gene set sizes for terms in TableS2 (top 100 ranked terms)**

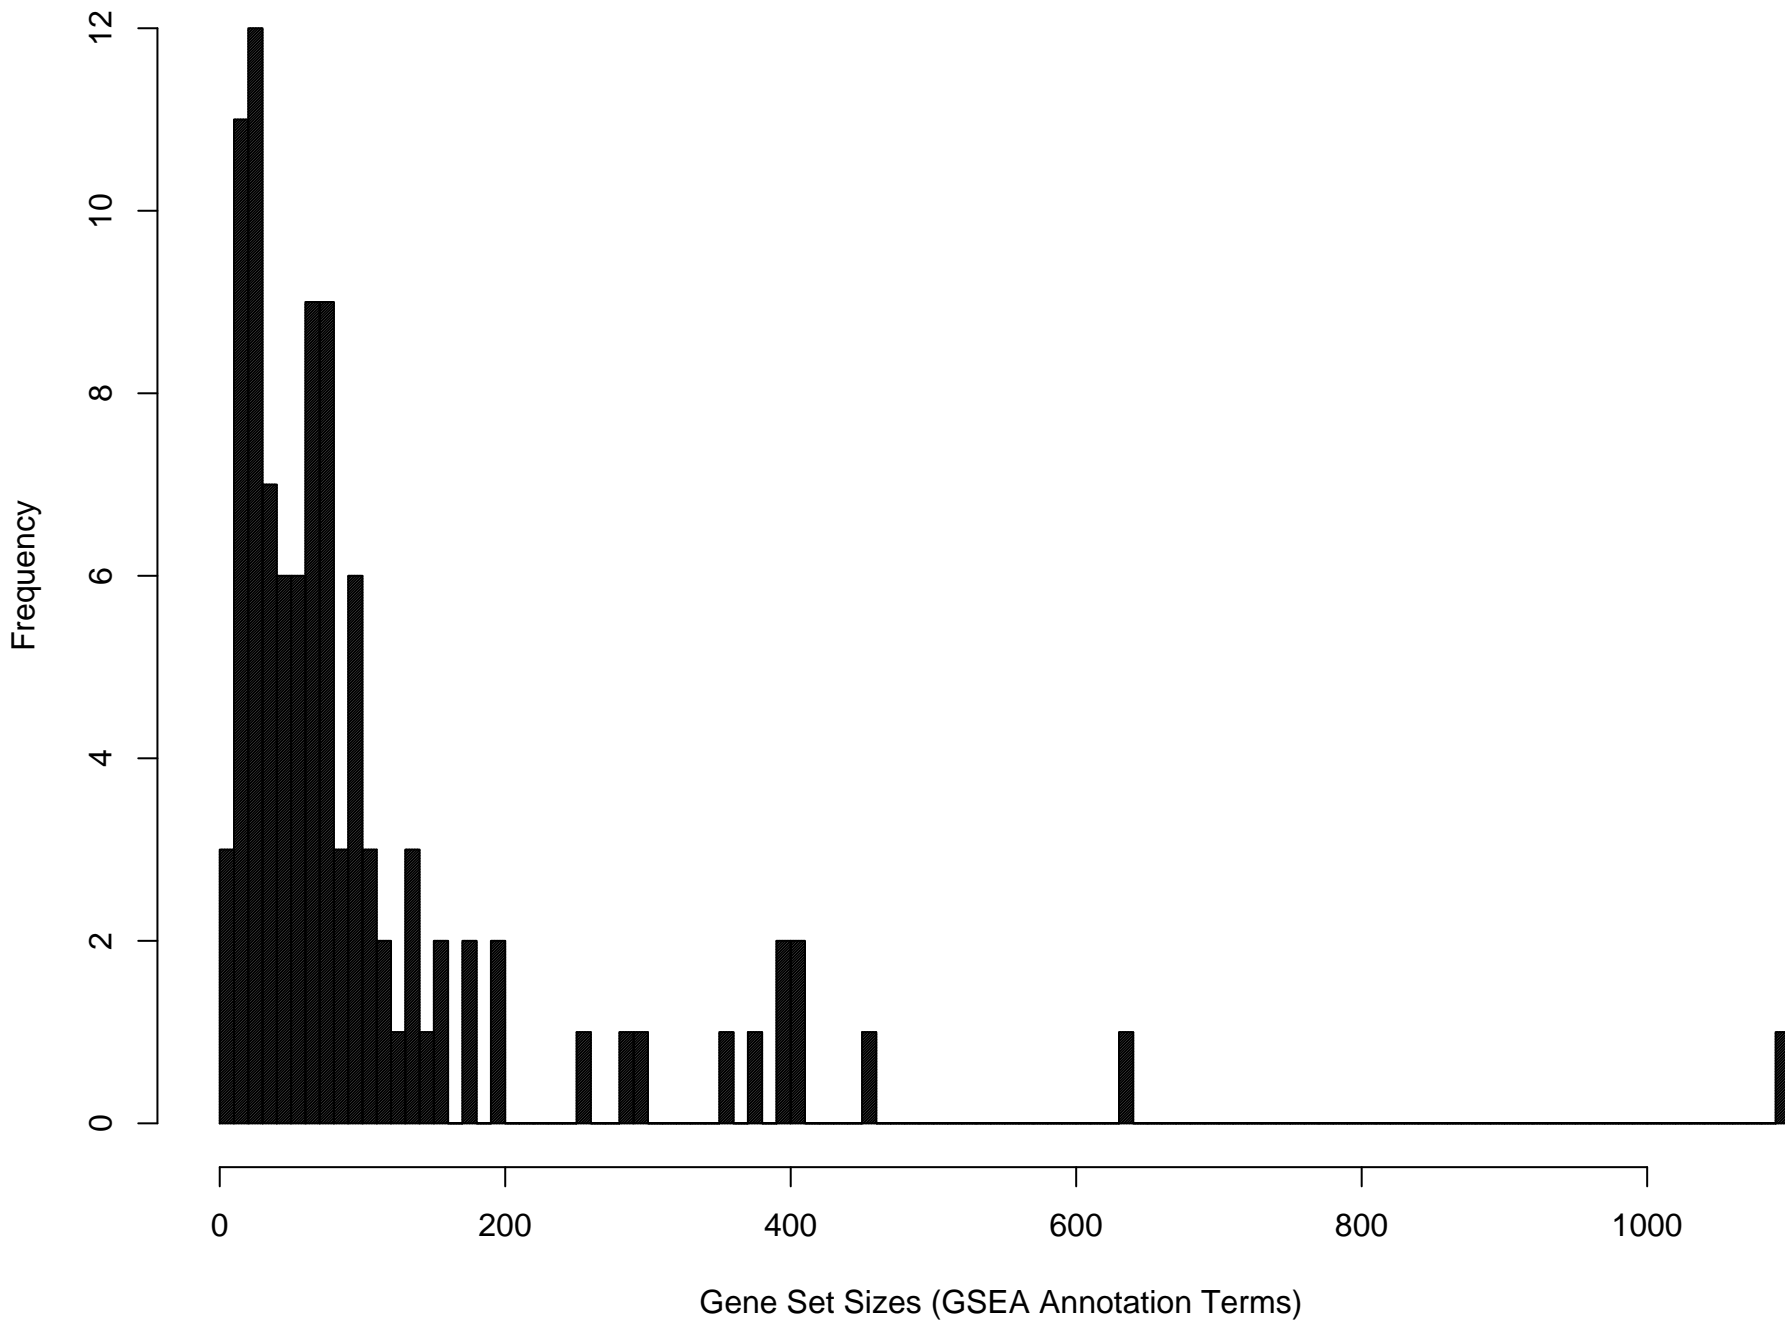

Histogram distribution of gene set sizes for terms in TableS2 (top 50 ranked terms)

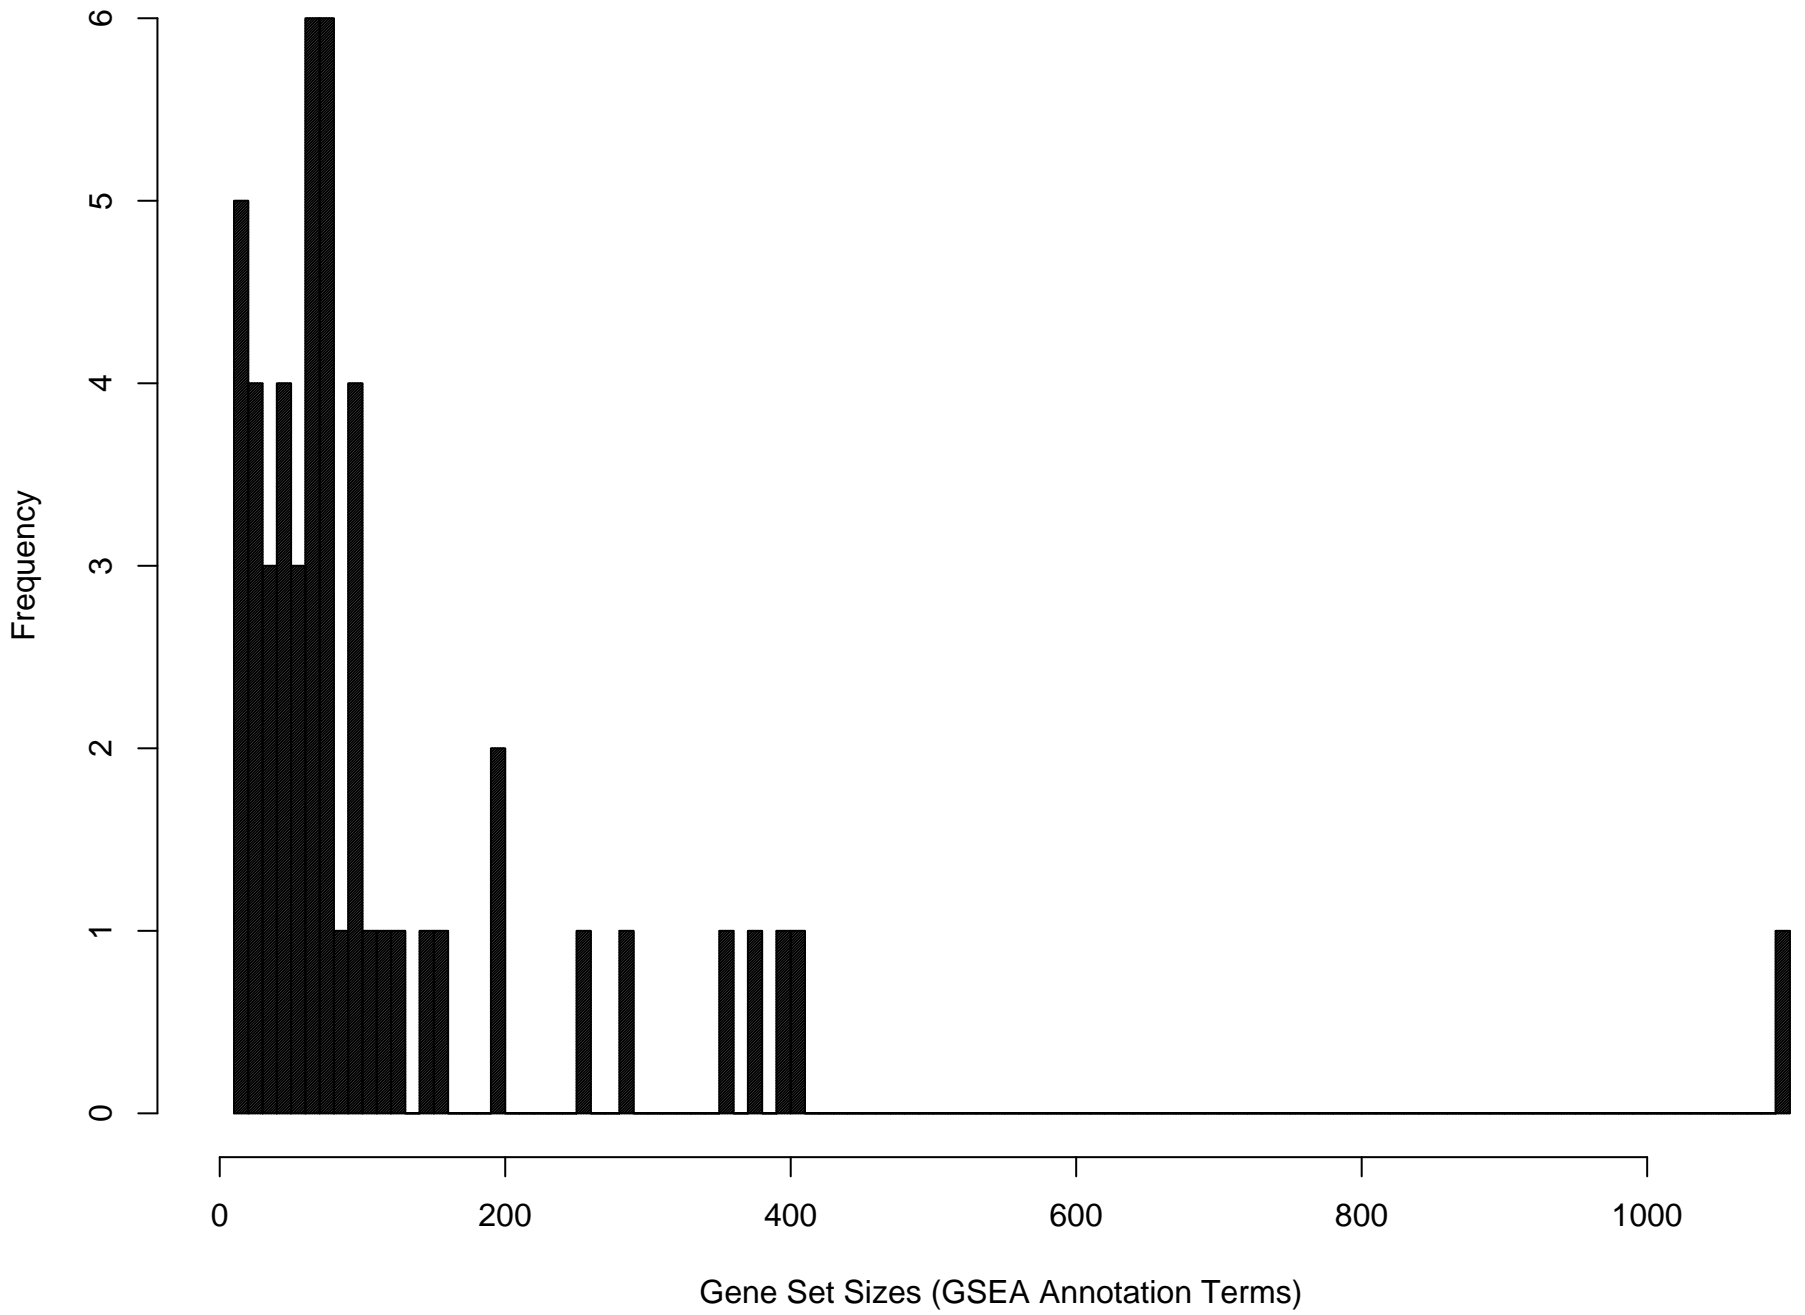

**Histogram distribution of gene set sizes for terms in TableS2 (top 10 ranked terms)**

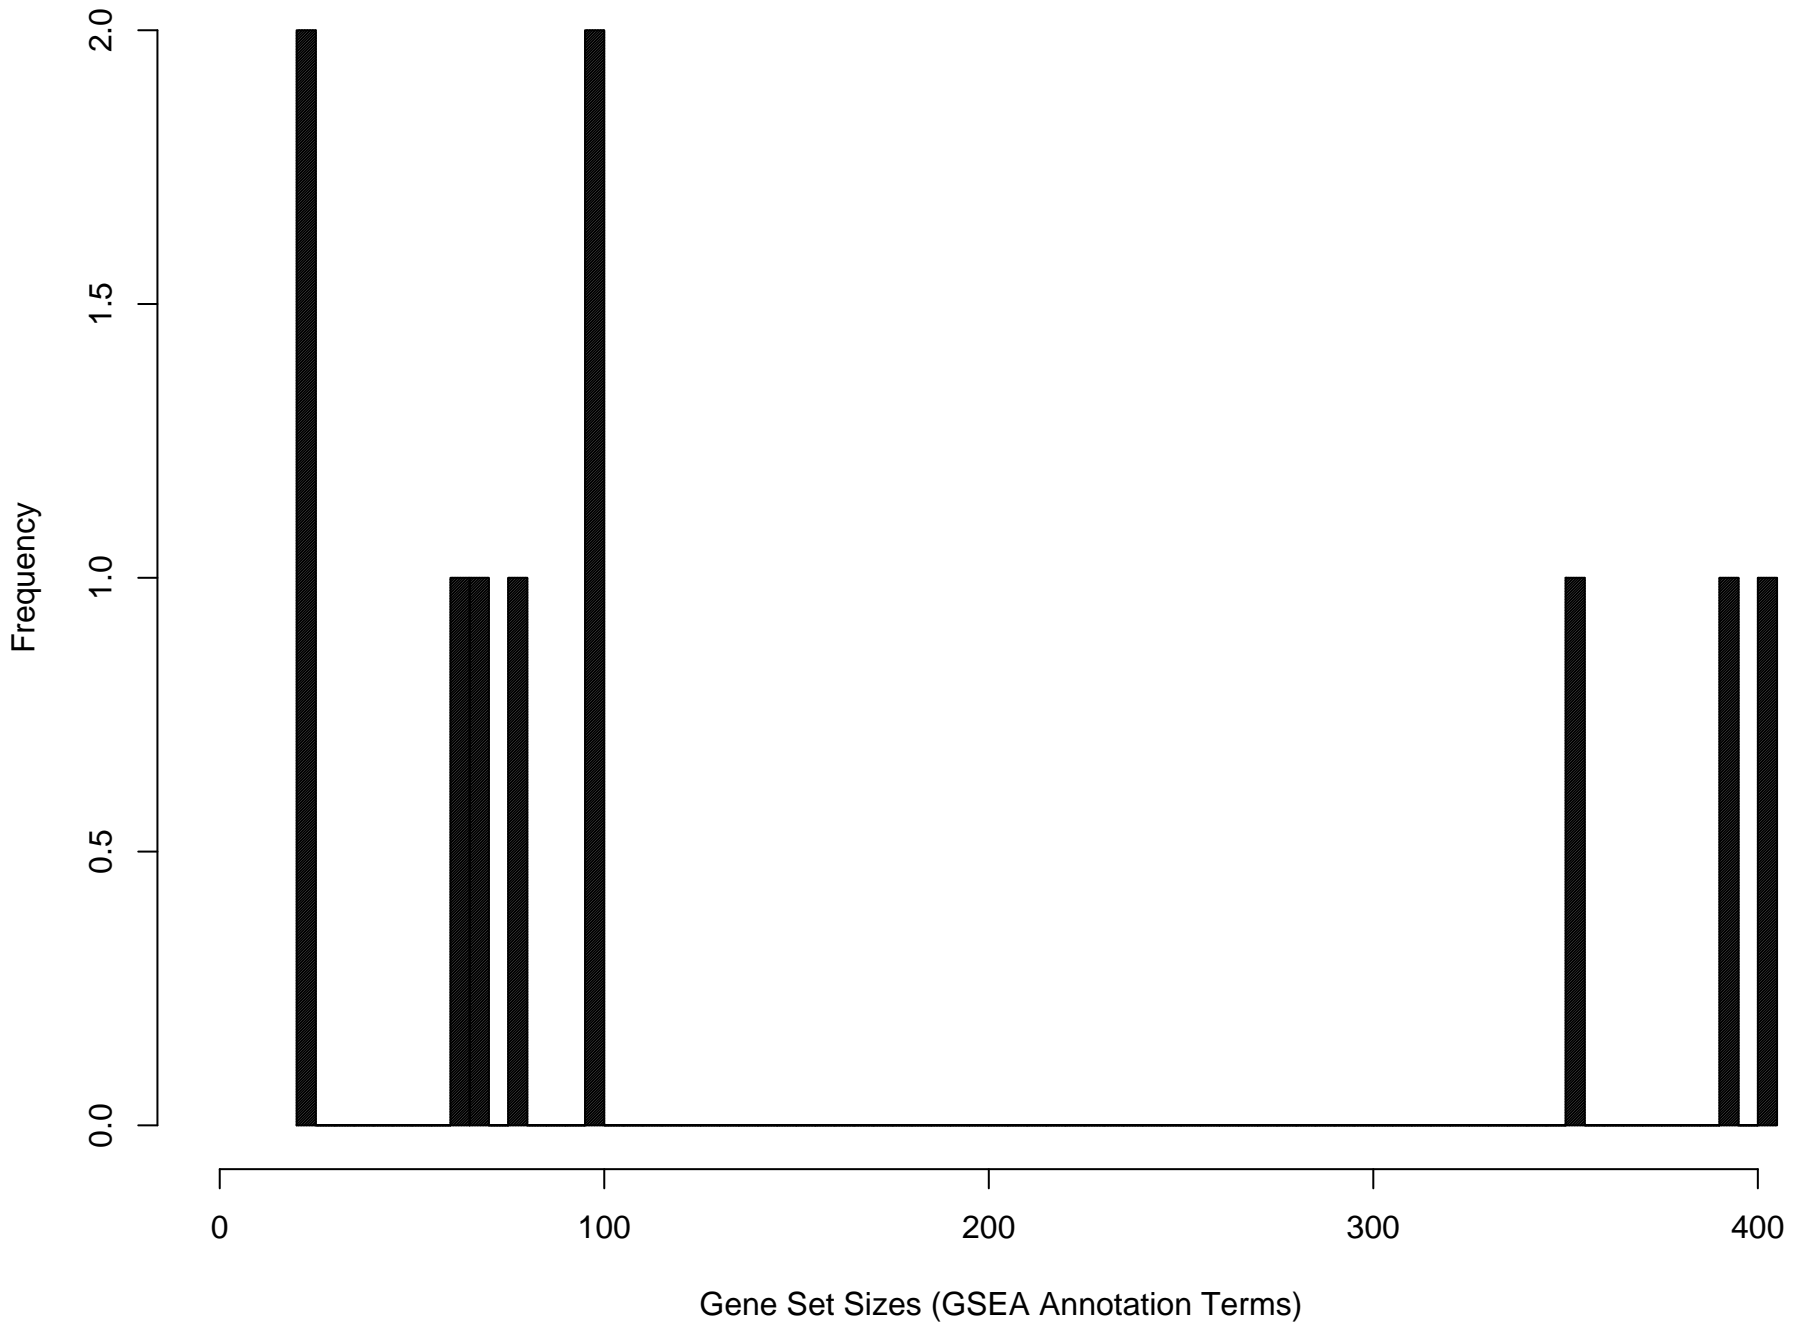

Distribution of SLEPR pathway ranking scores vs gene set sizes for data in TableS4

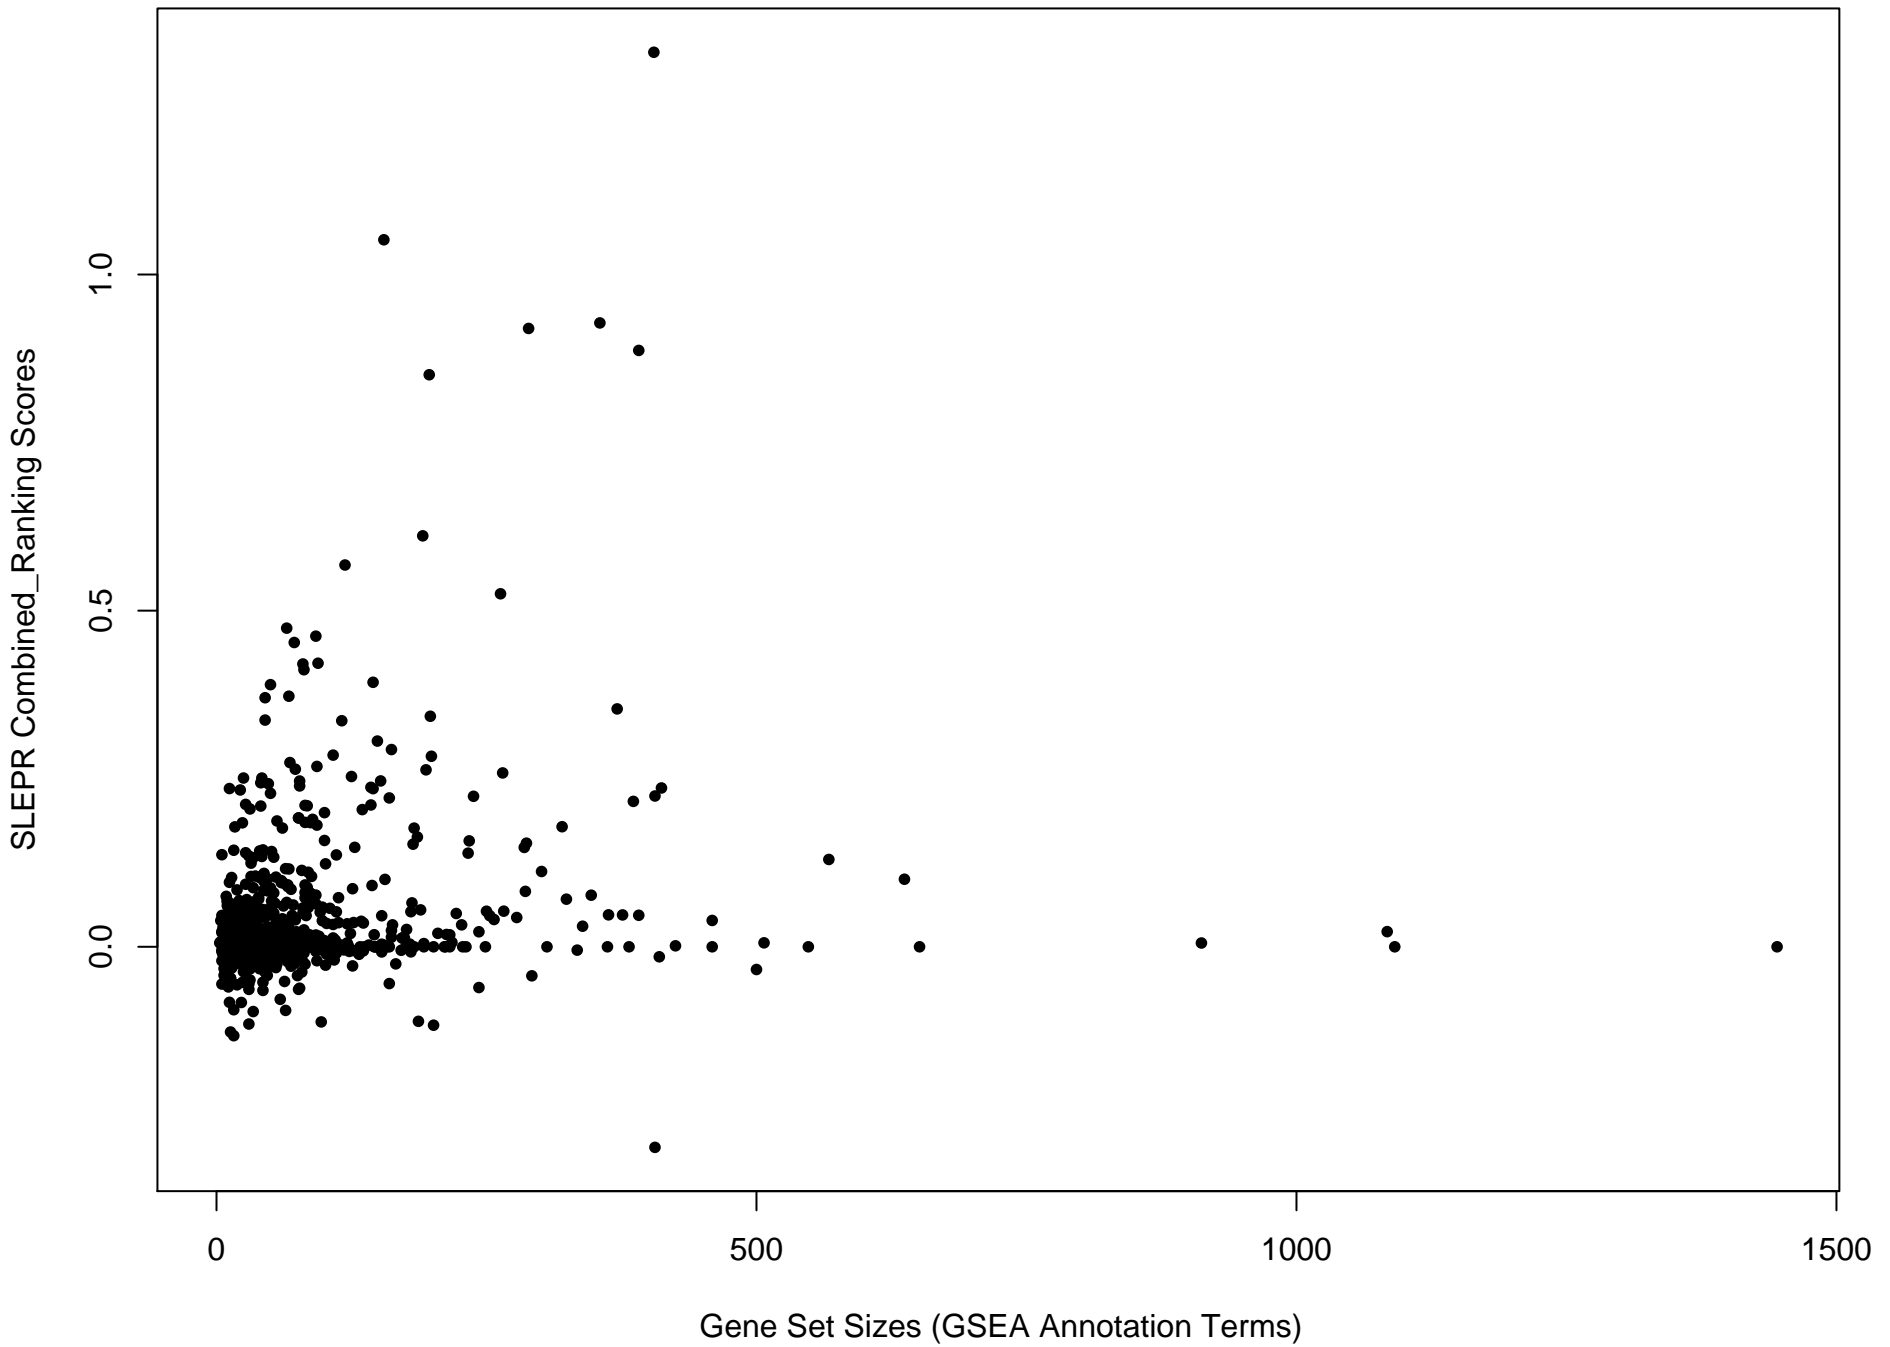



Distribution of SLEPR pathway ranking scores vs gene set sizes for data in TableS4 (size: 0–500)

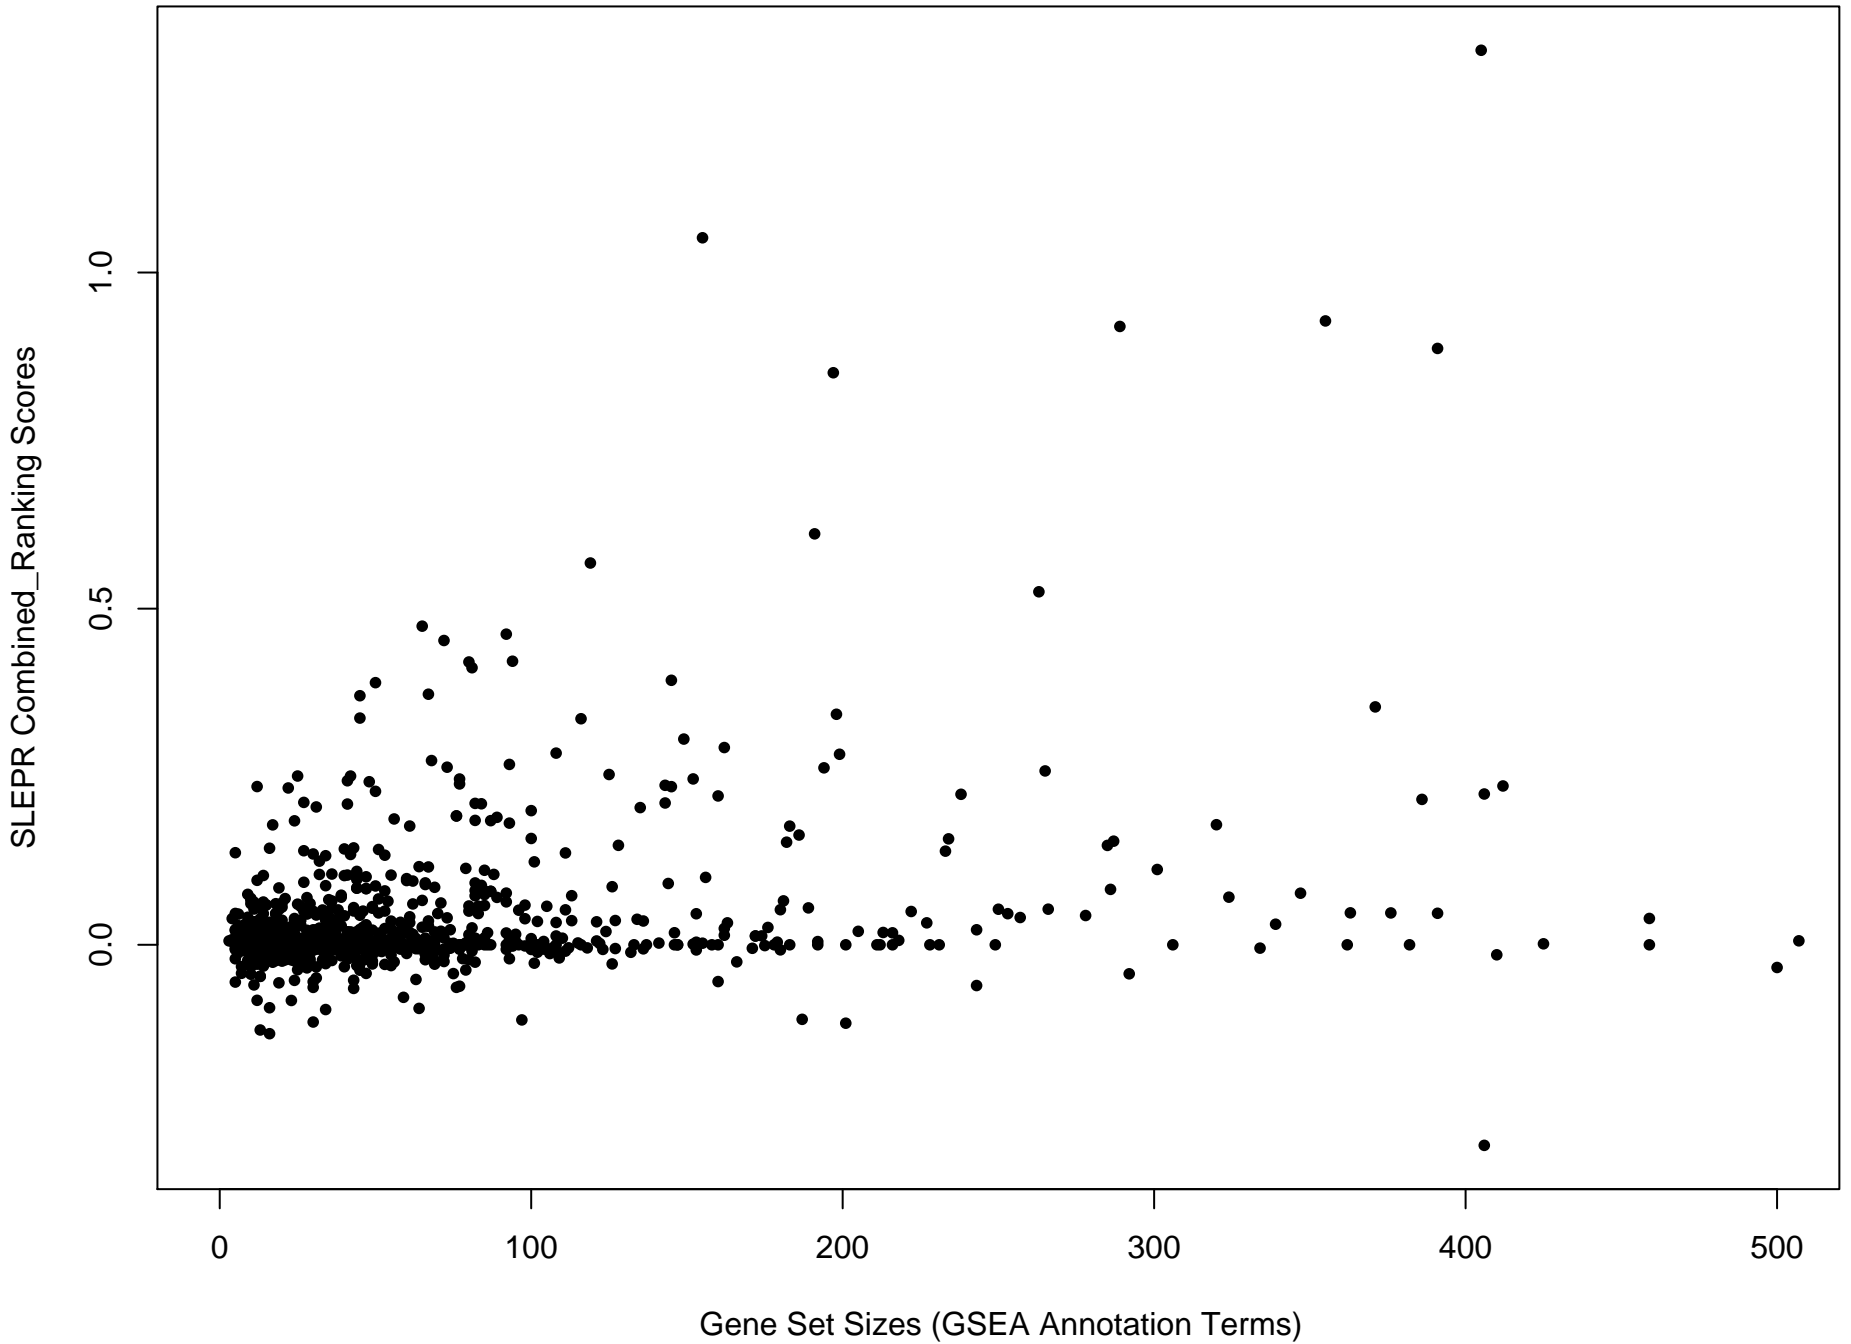

Distribution of SLEPR pathway ranking scores vs gene set sizes for data in TableS4 (size: 0–200)

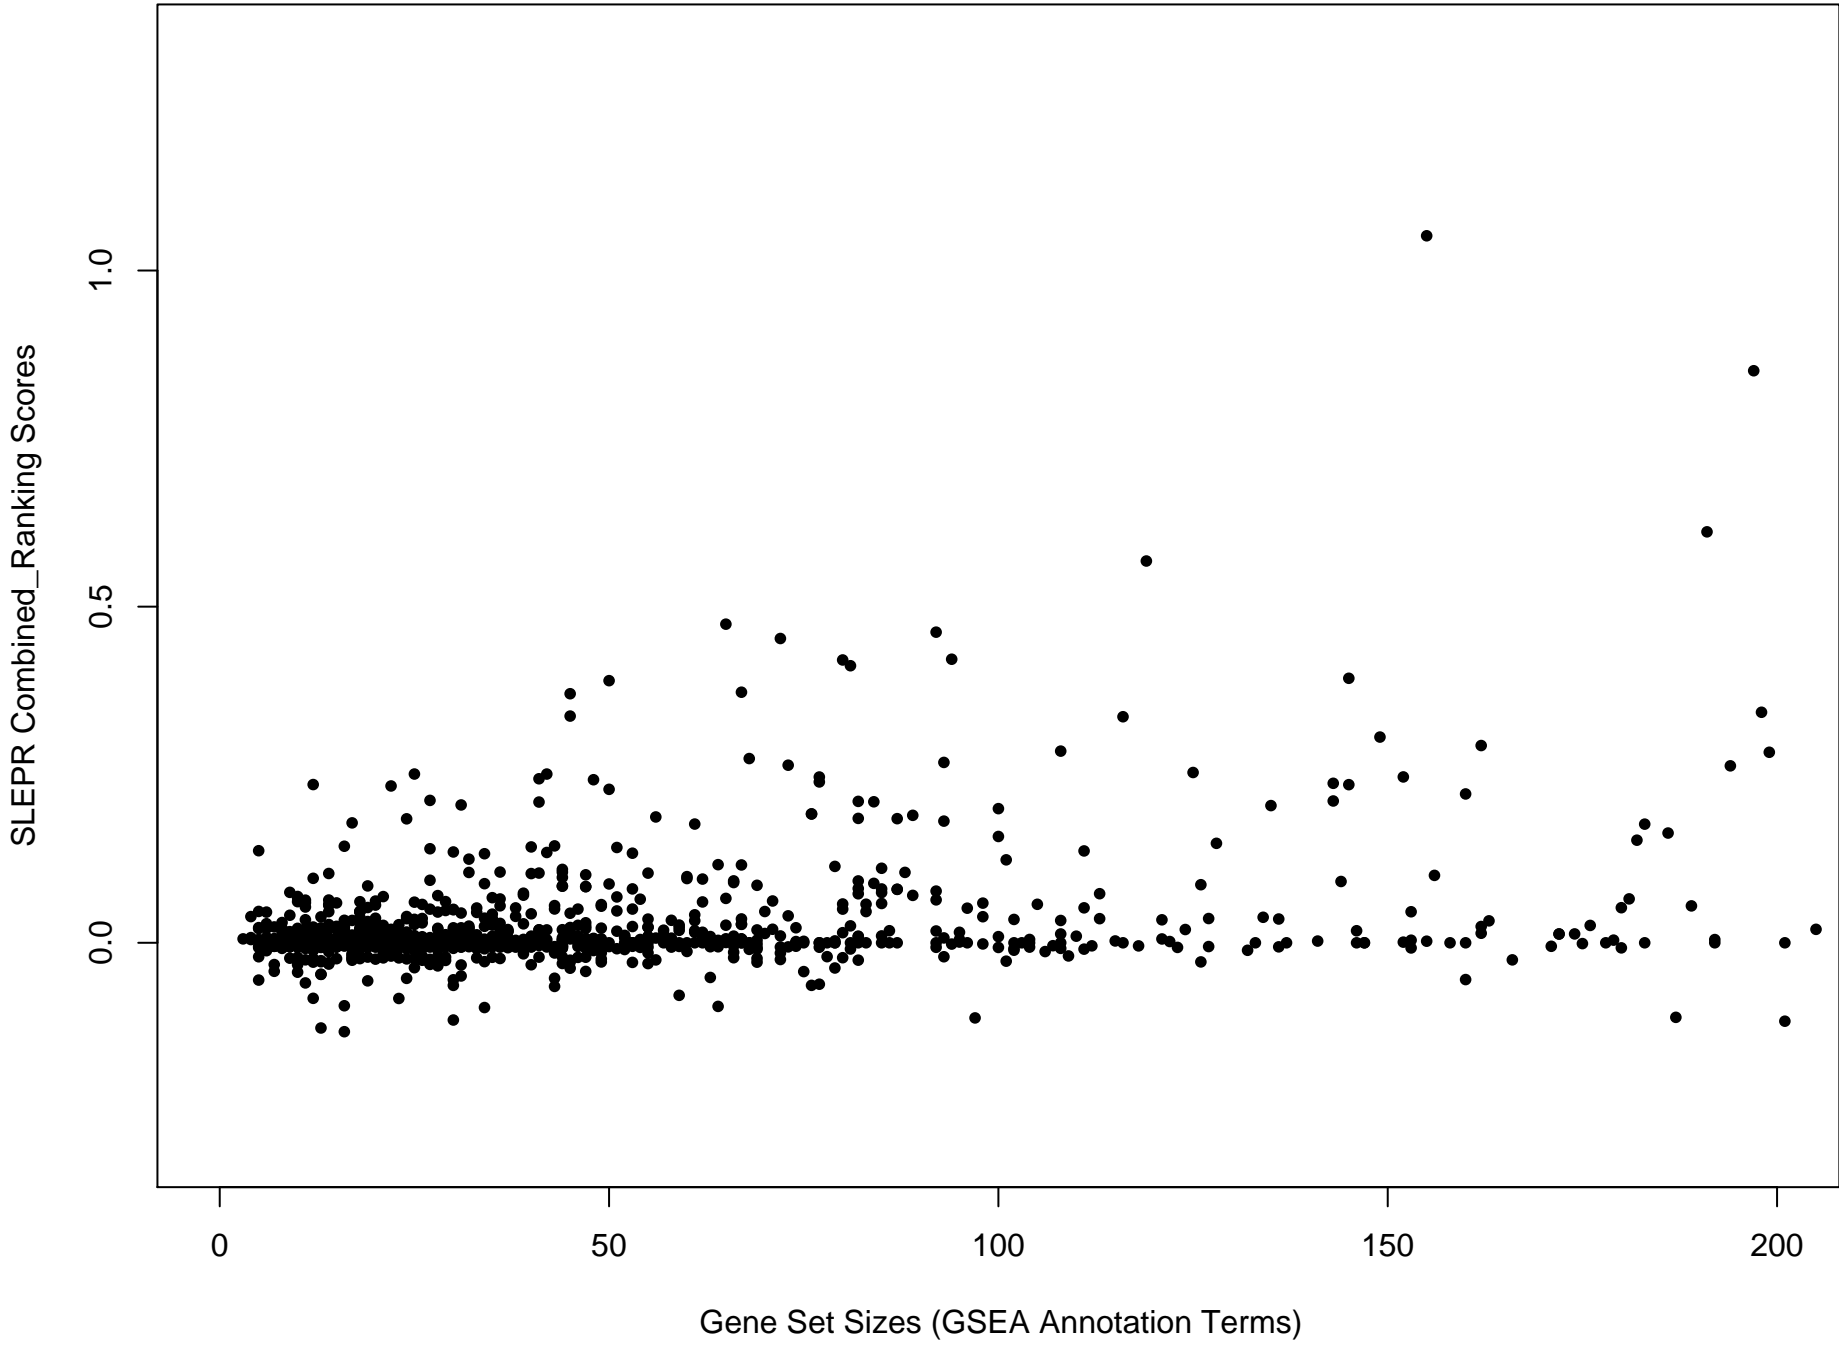

Histogram distribution of gene set sizes for terms in TableS4

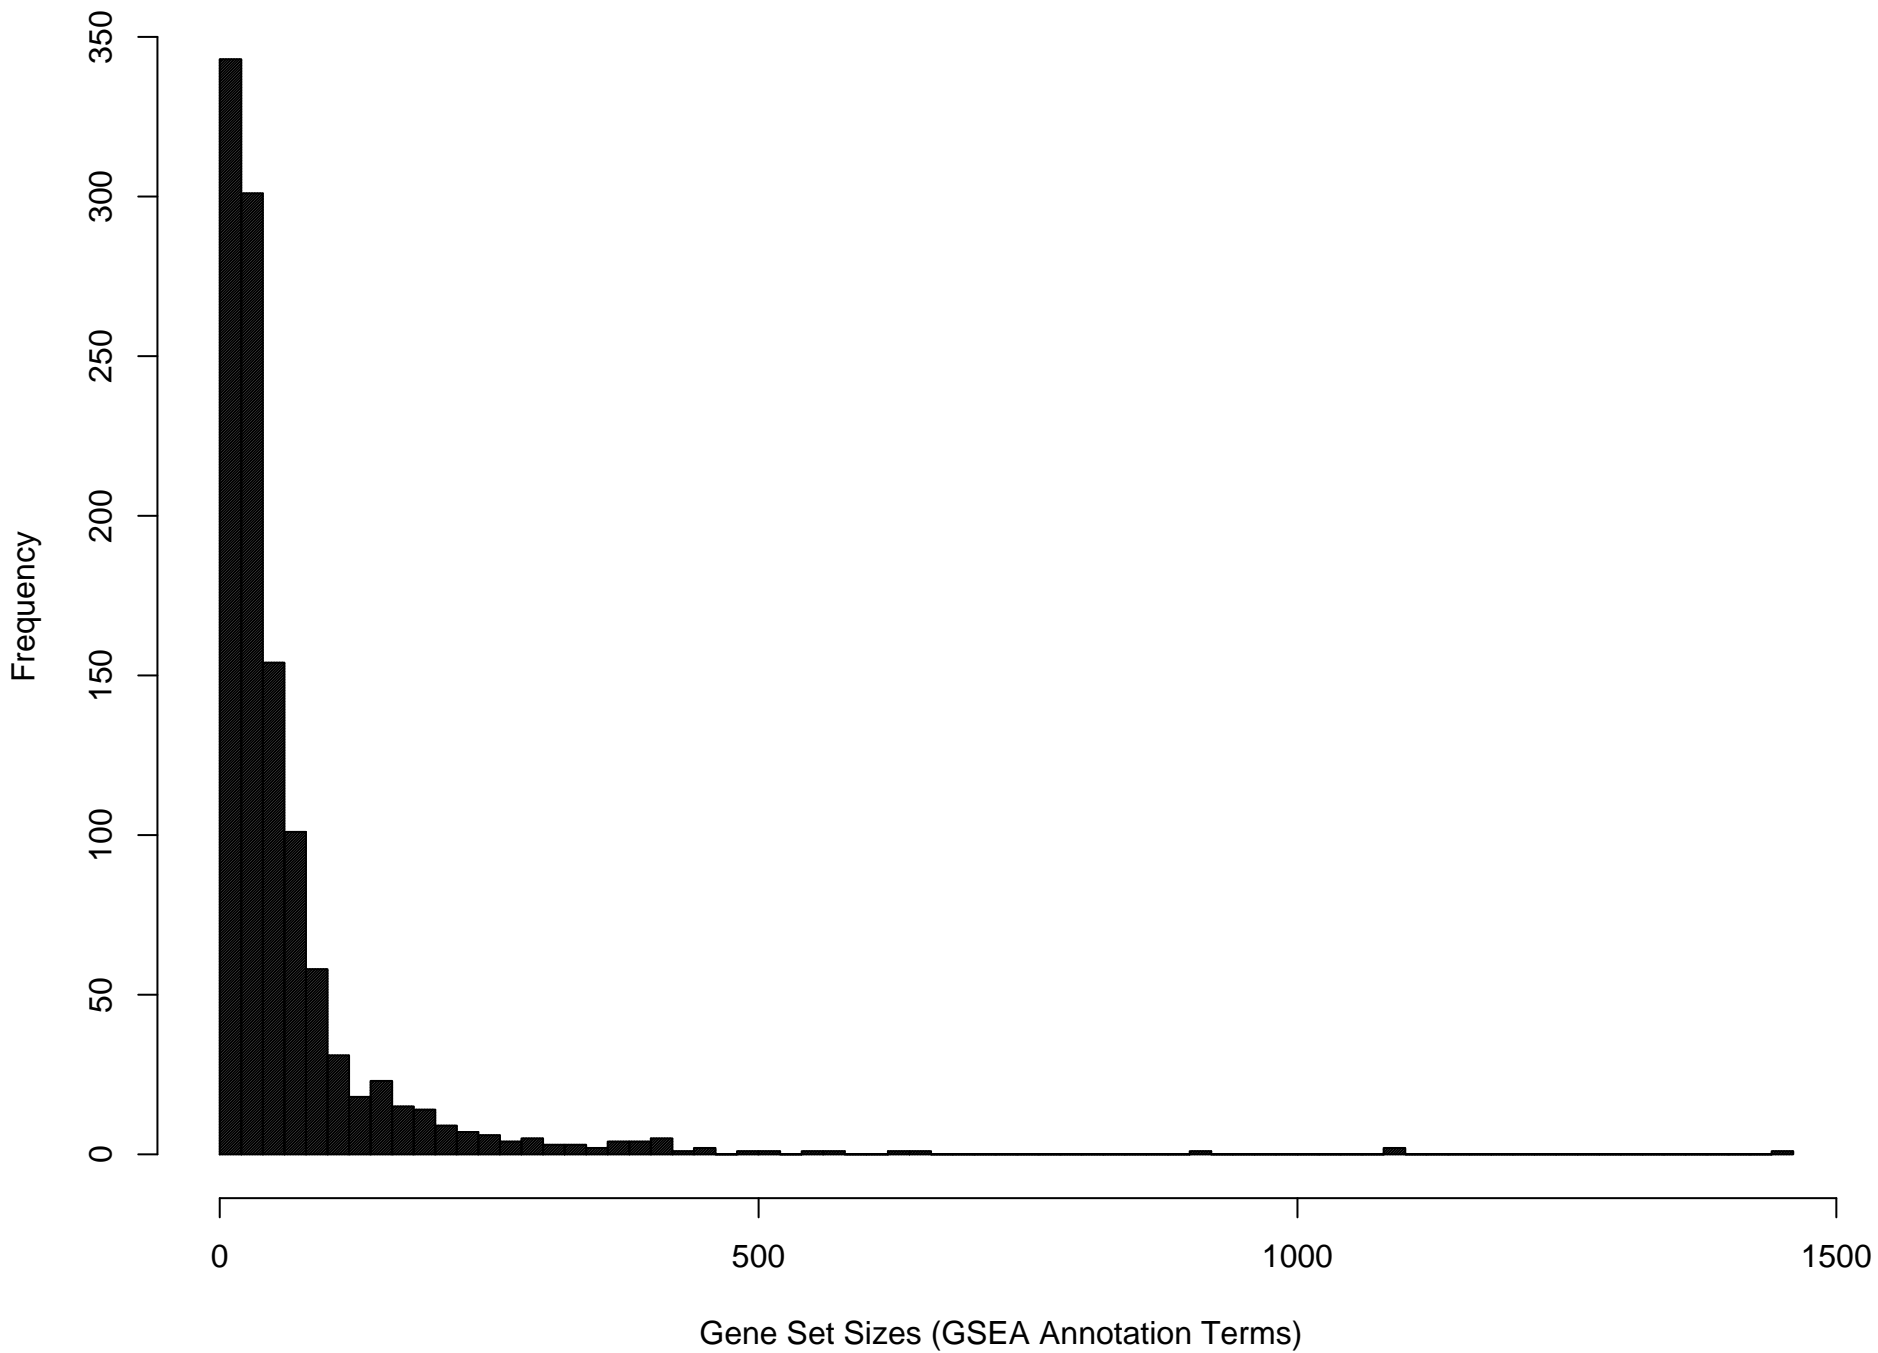

**Histogram distribution of gene set sizes for terms in TableS4 (top 100 ranked terms)**

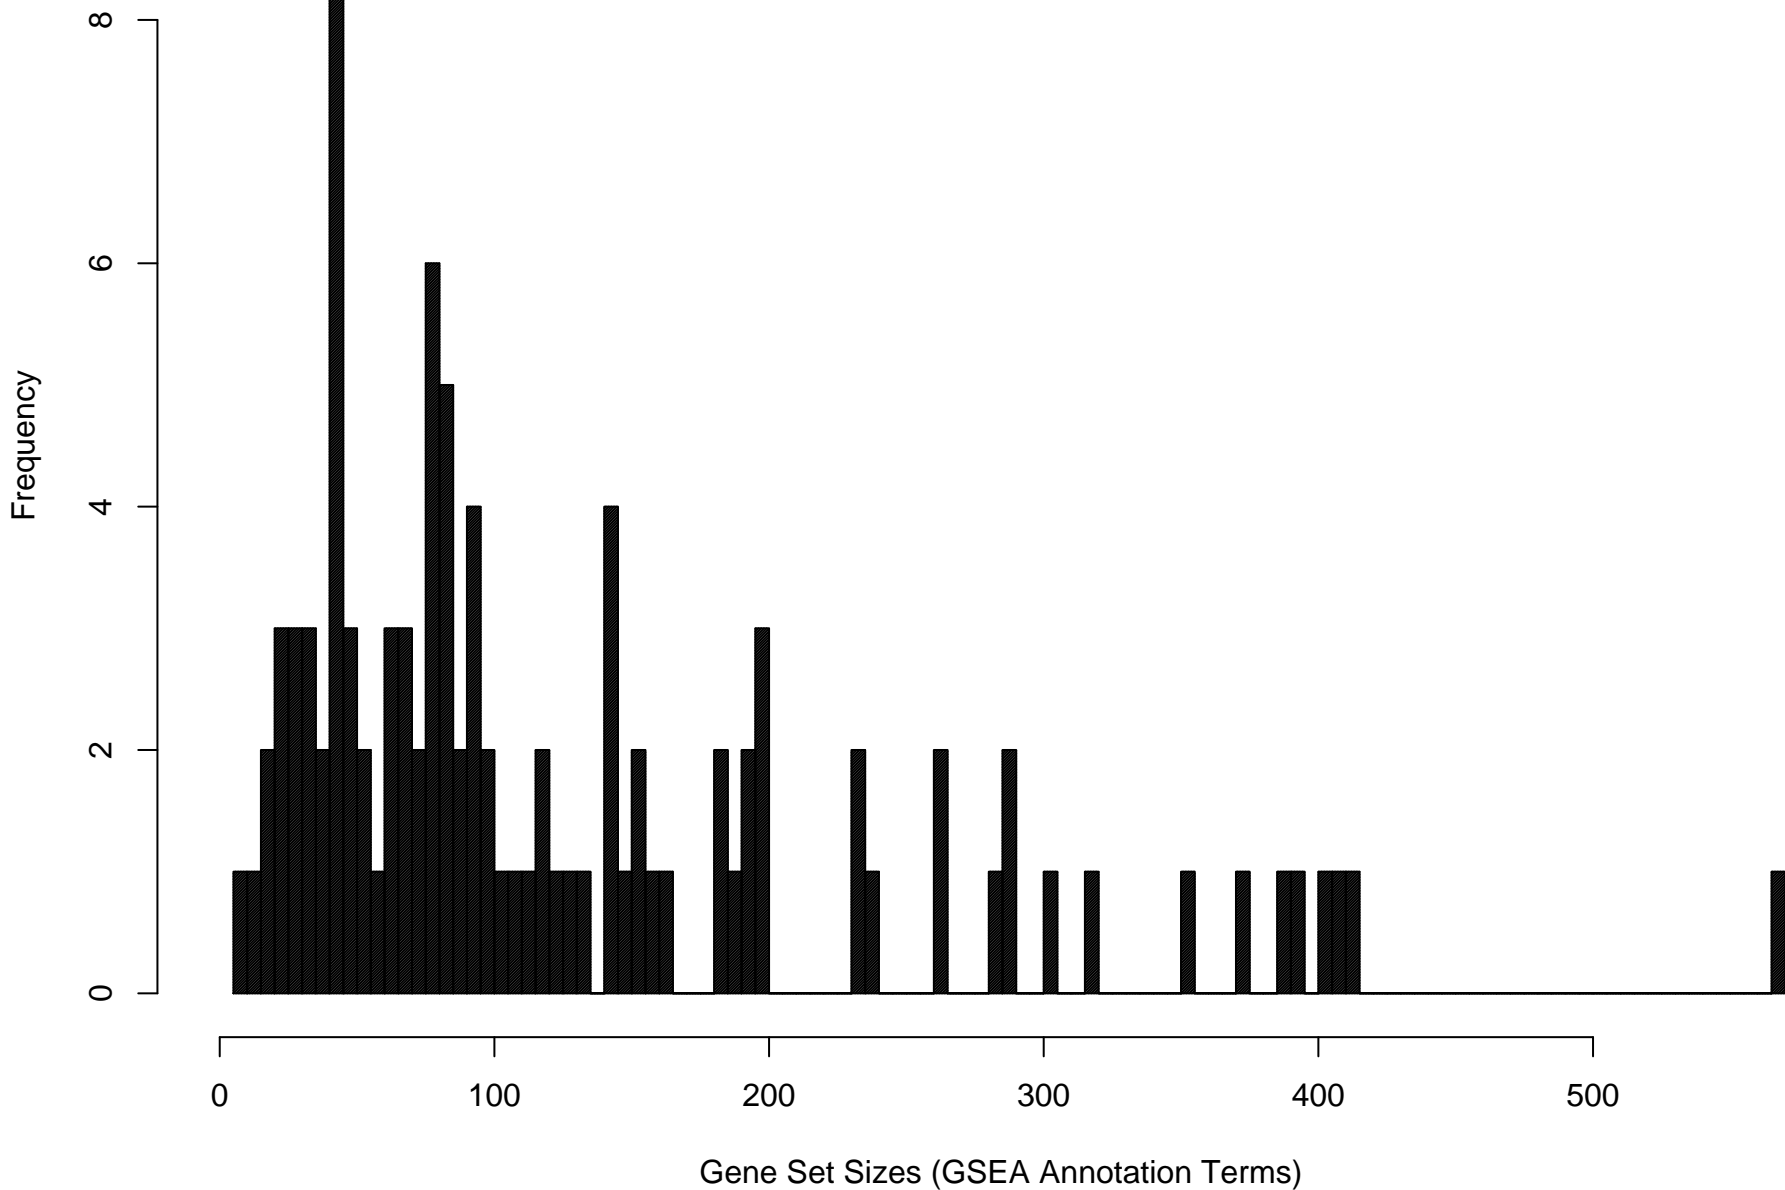

Histogram distribution of gene set sizes for terms in TableS4 (top 50 ranked terms)

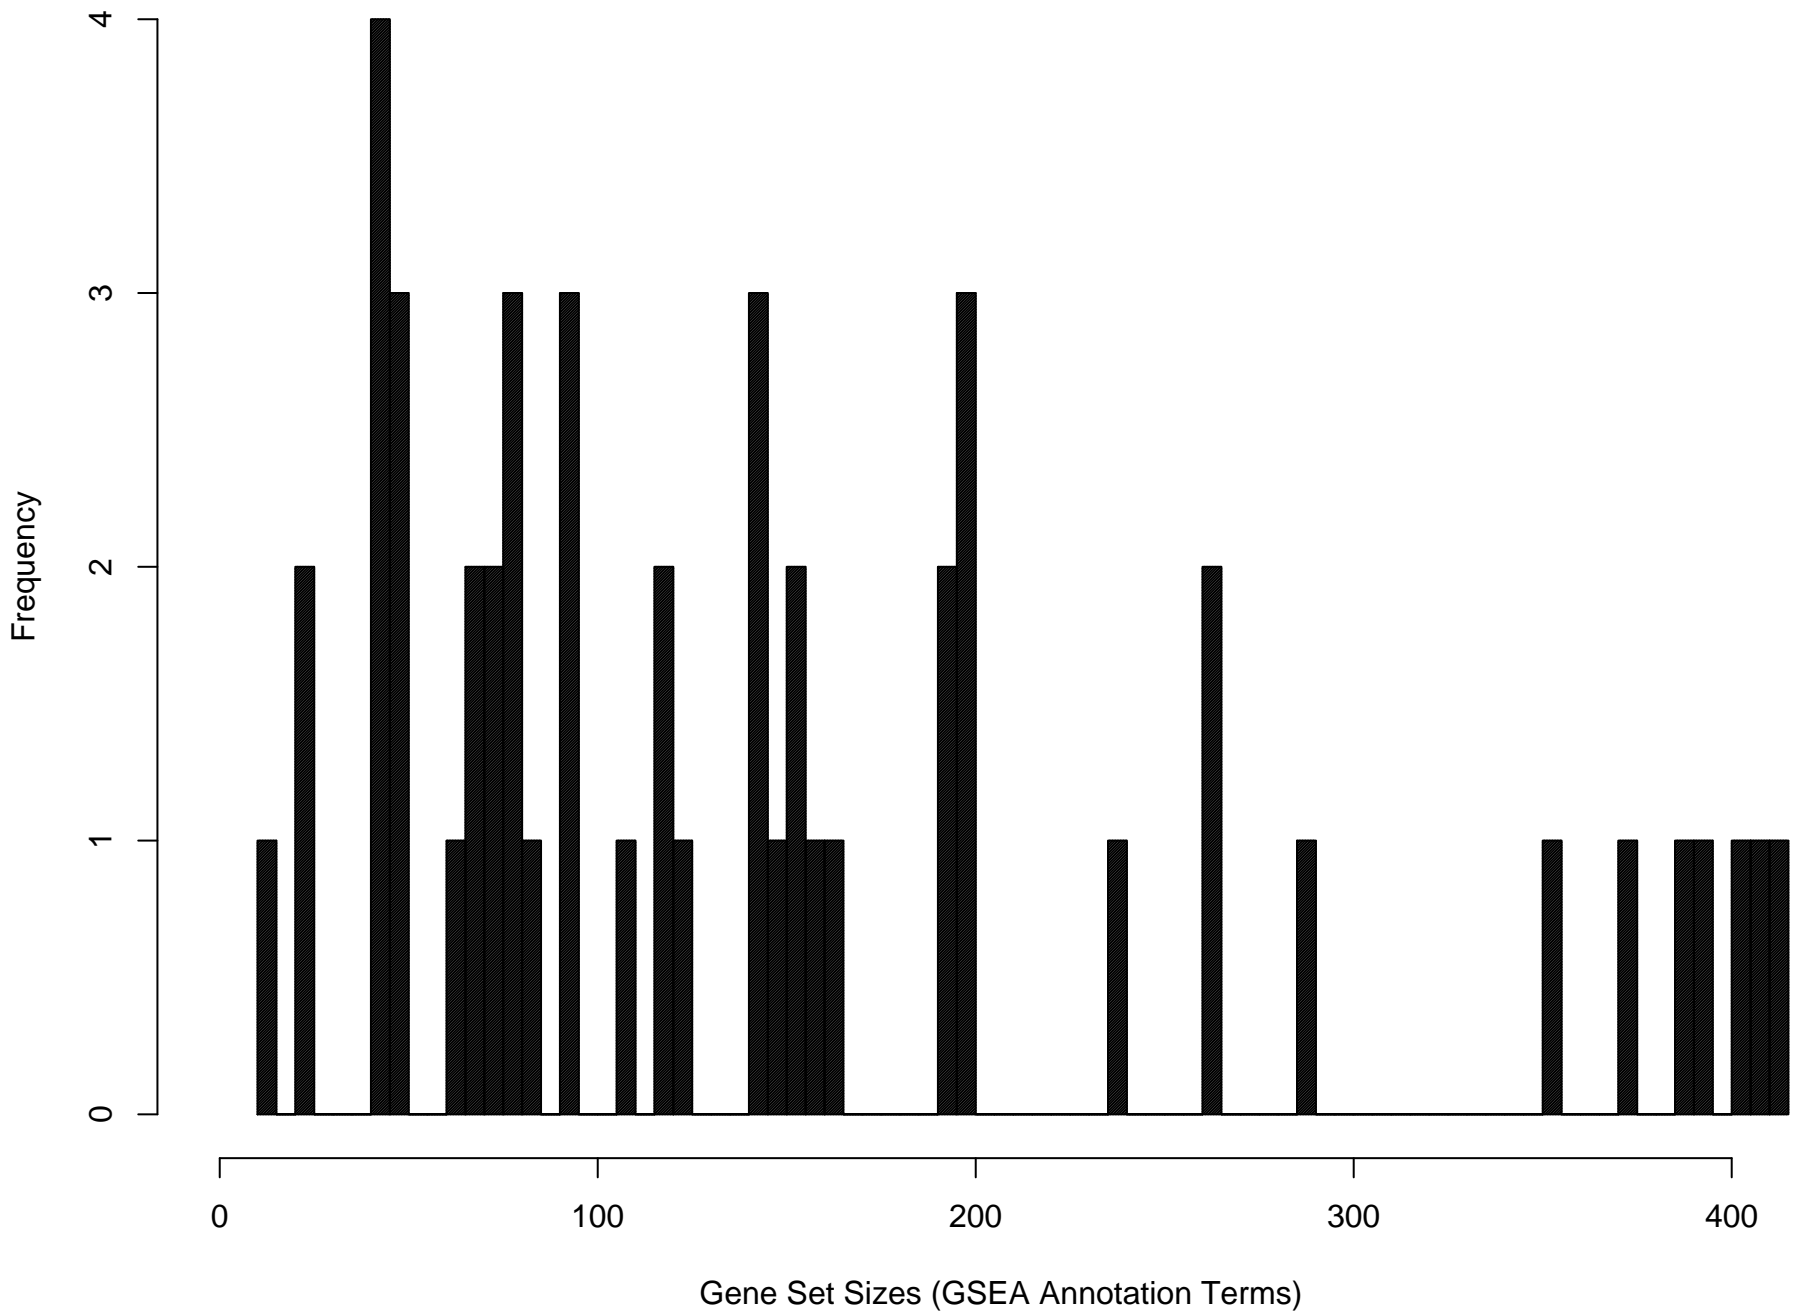

**Histogram distribution of gene set sizes for terms in TableS4 (top 10 ranked terms)**

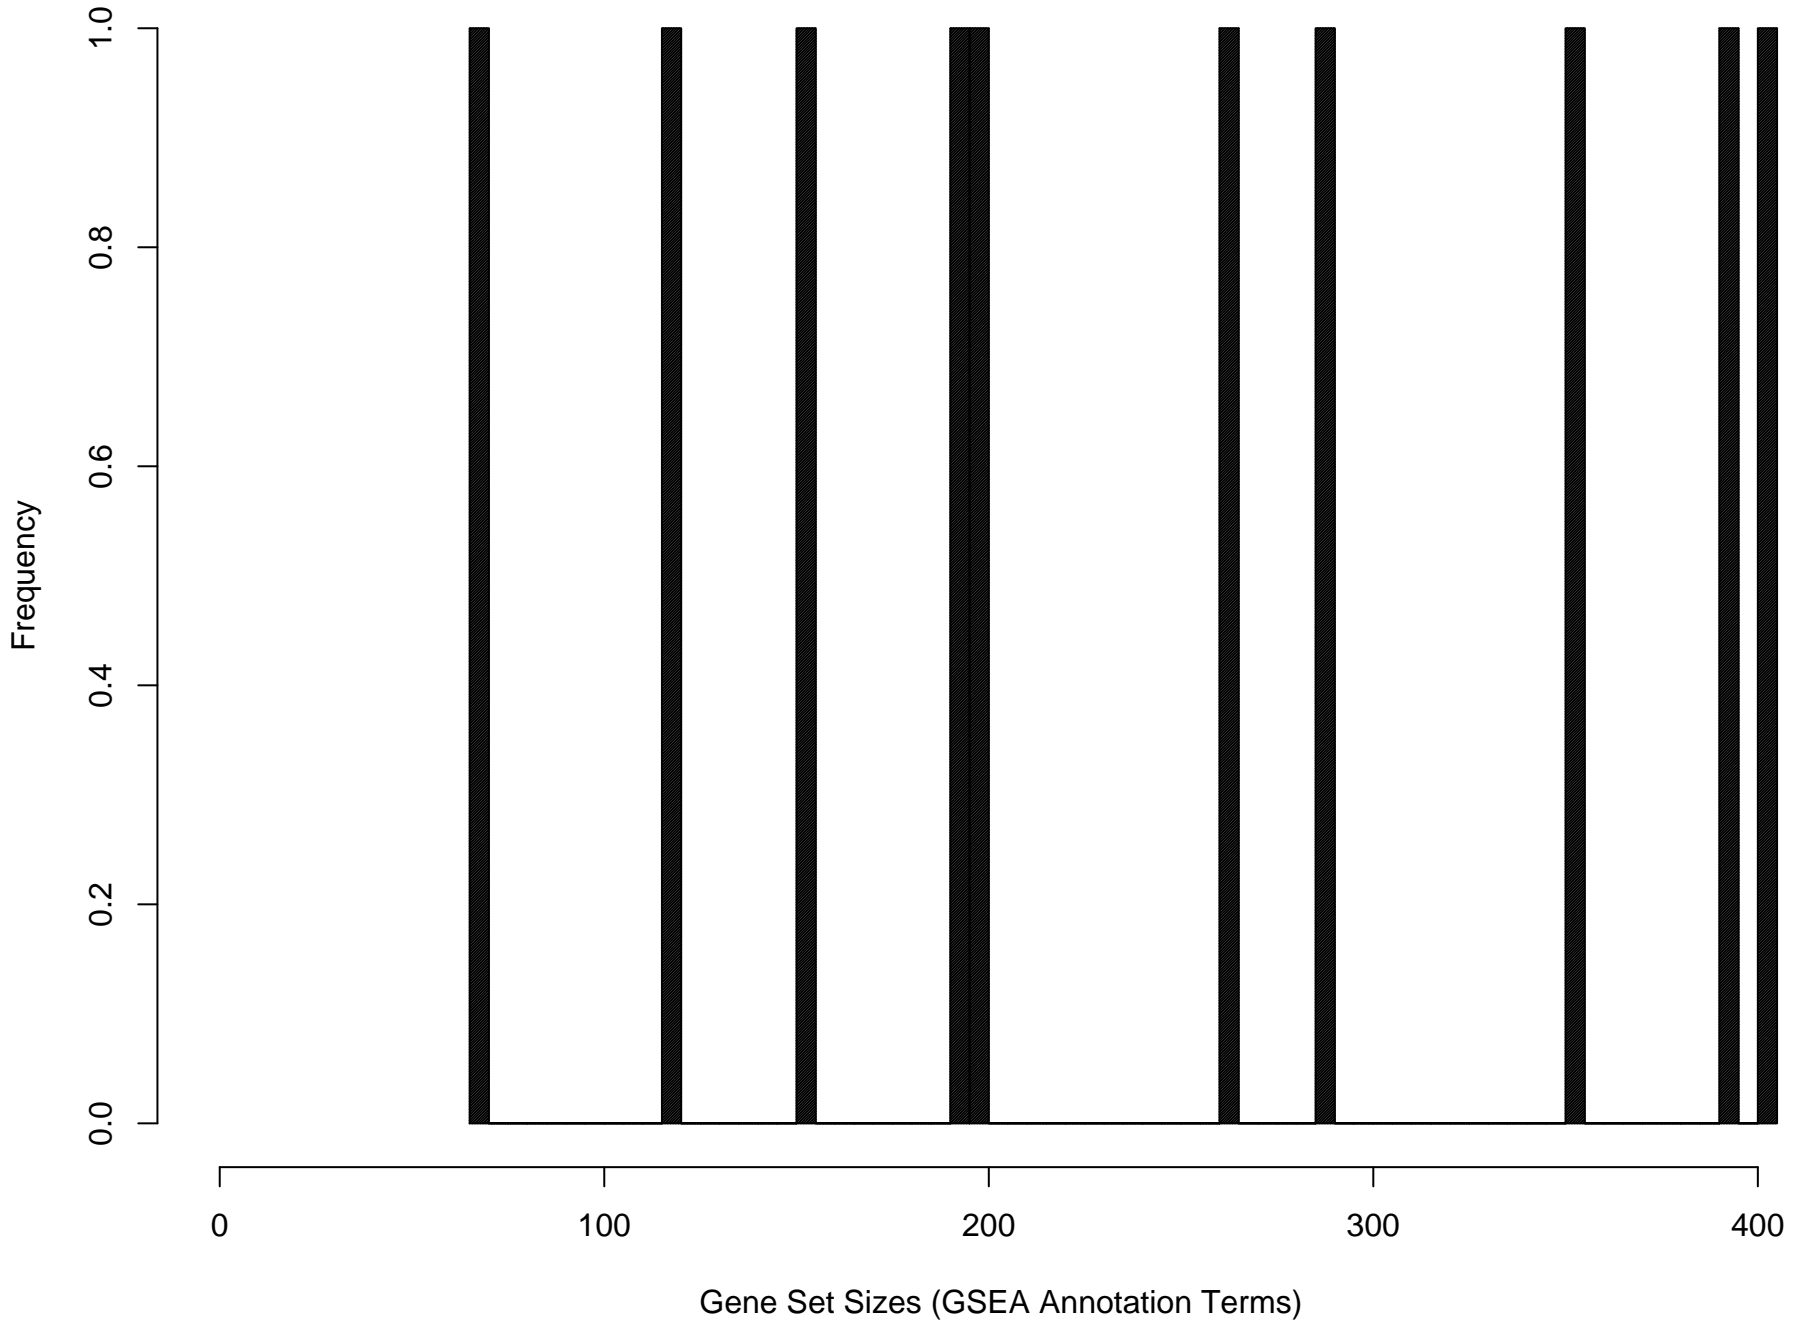

Distribution of SLEPR pathway ranking scores vs gene set sizes for data in TableS6

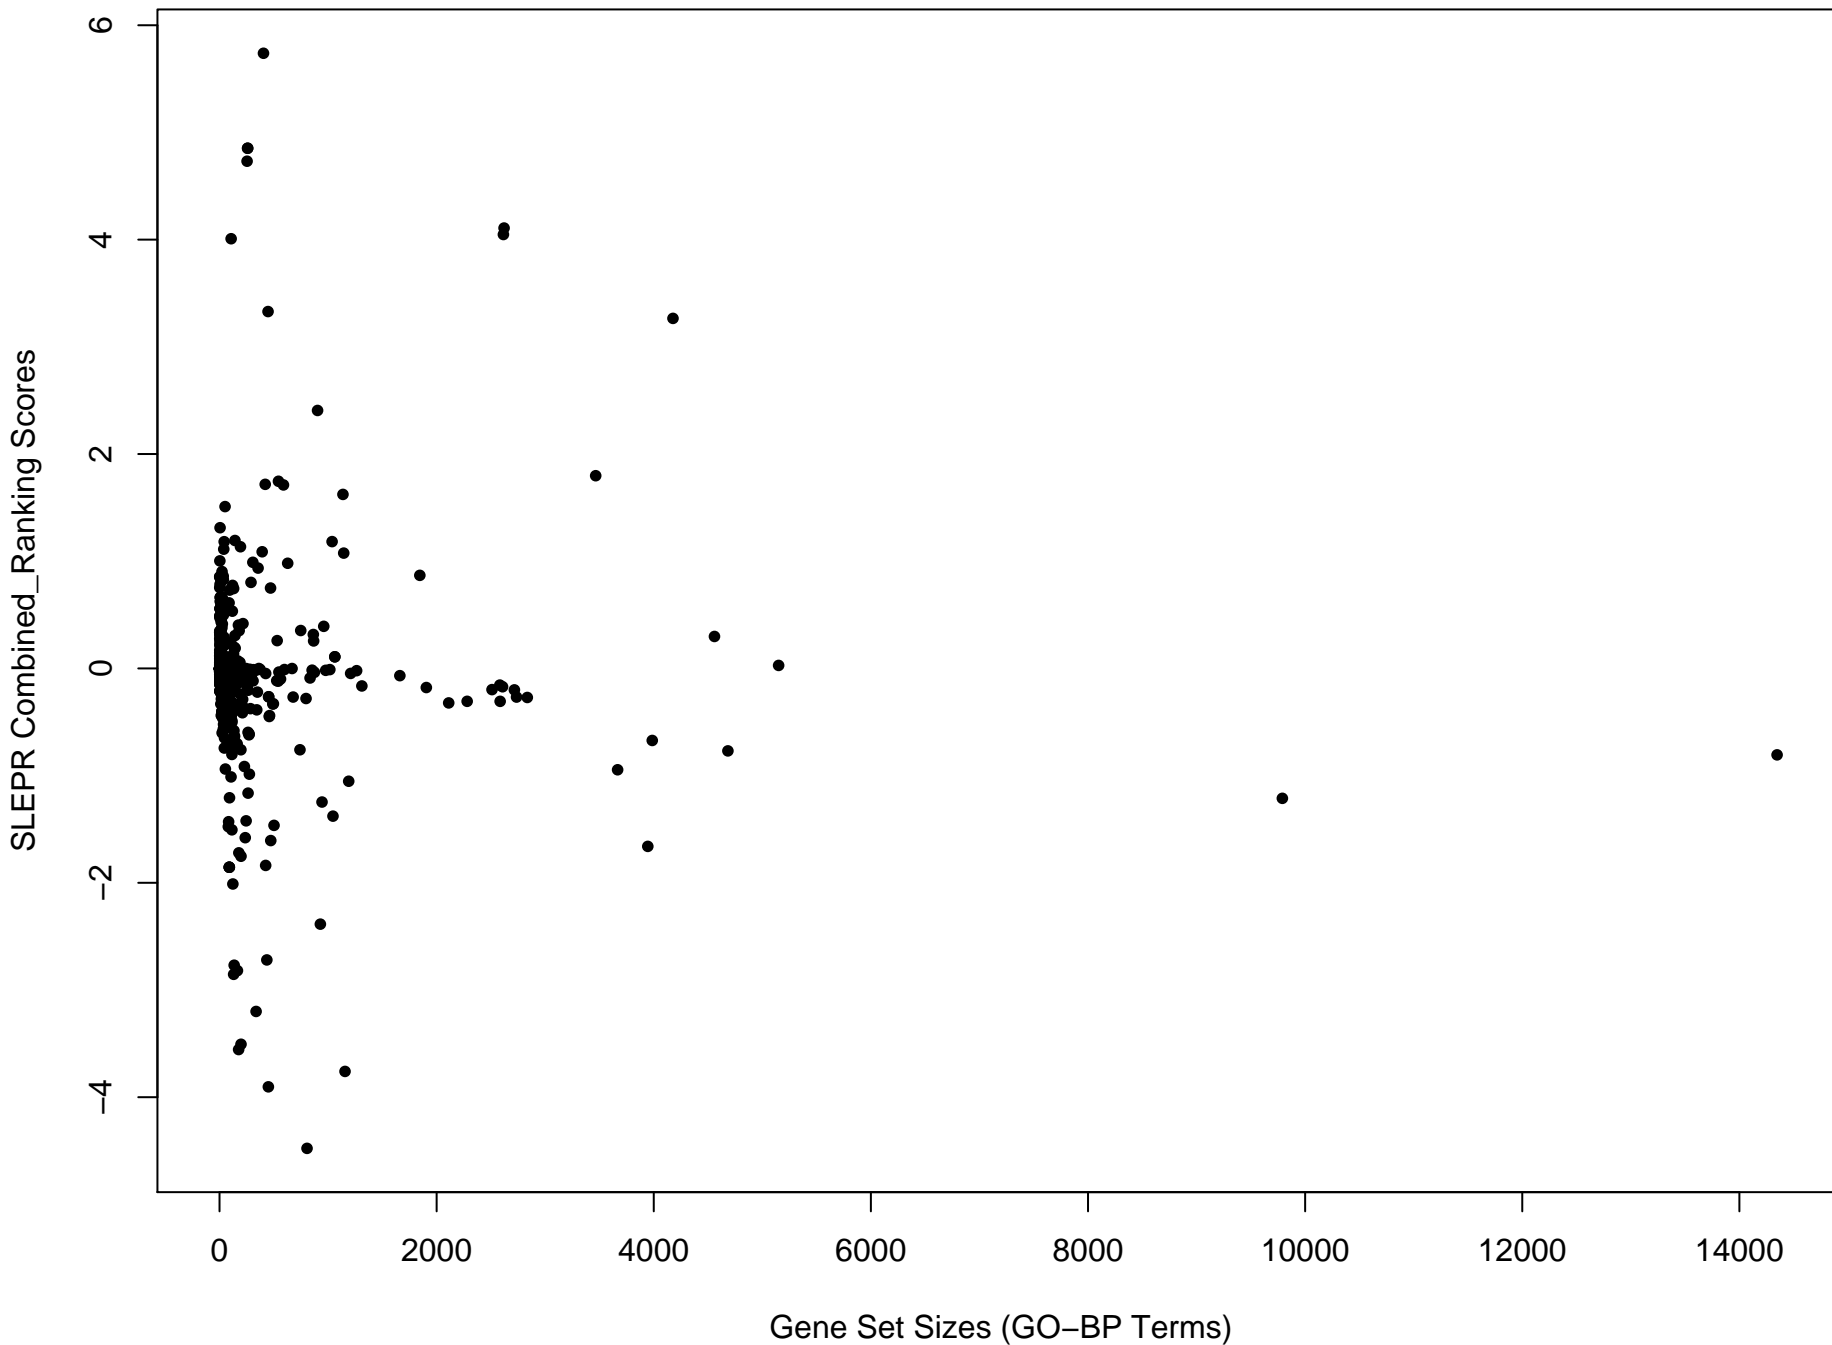

Distribution of SLEPR pathway ranking scores vs gene set sizes for data in TableS6 (size: 0–500)

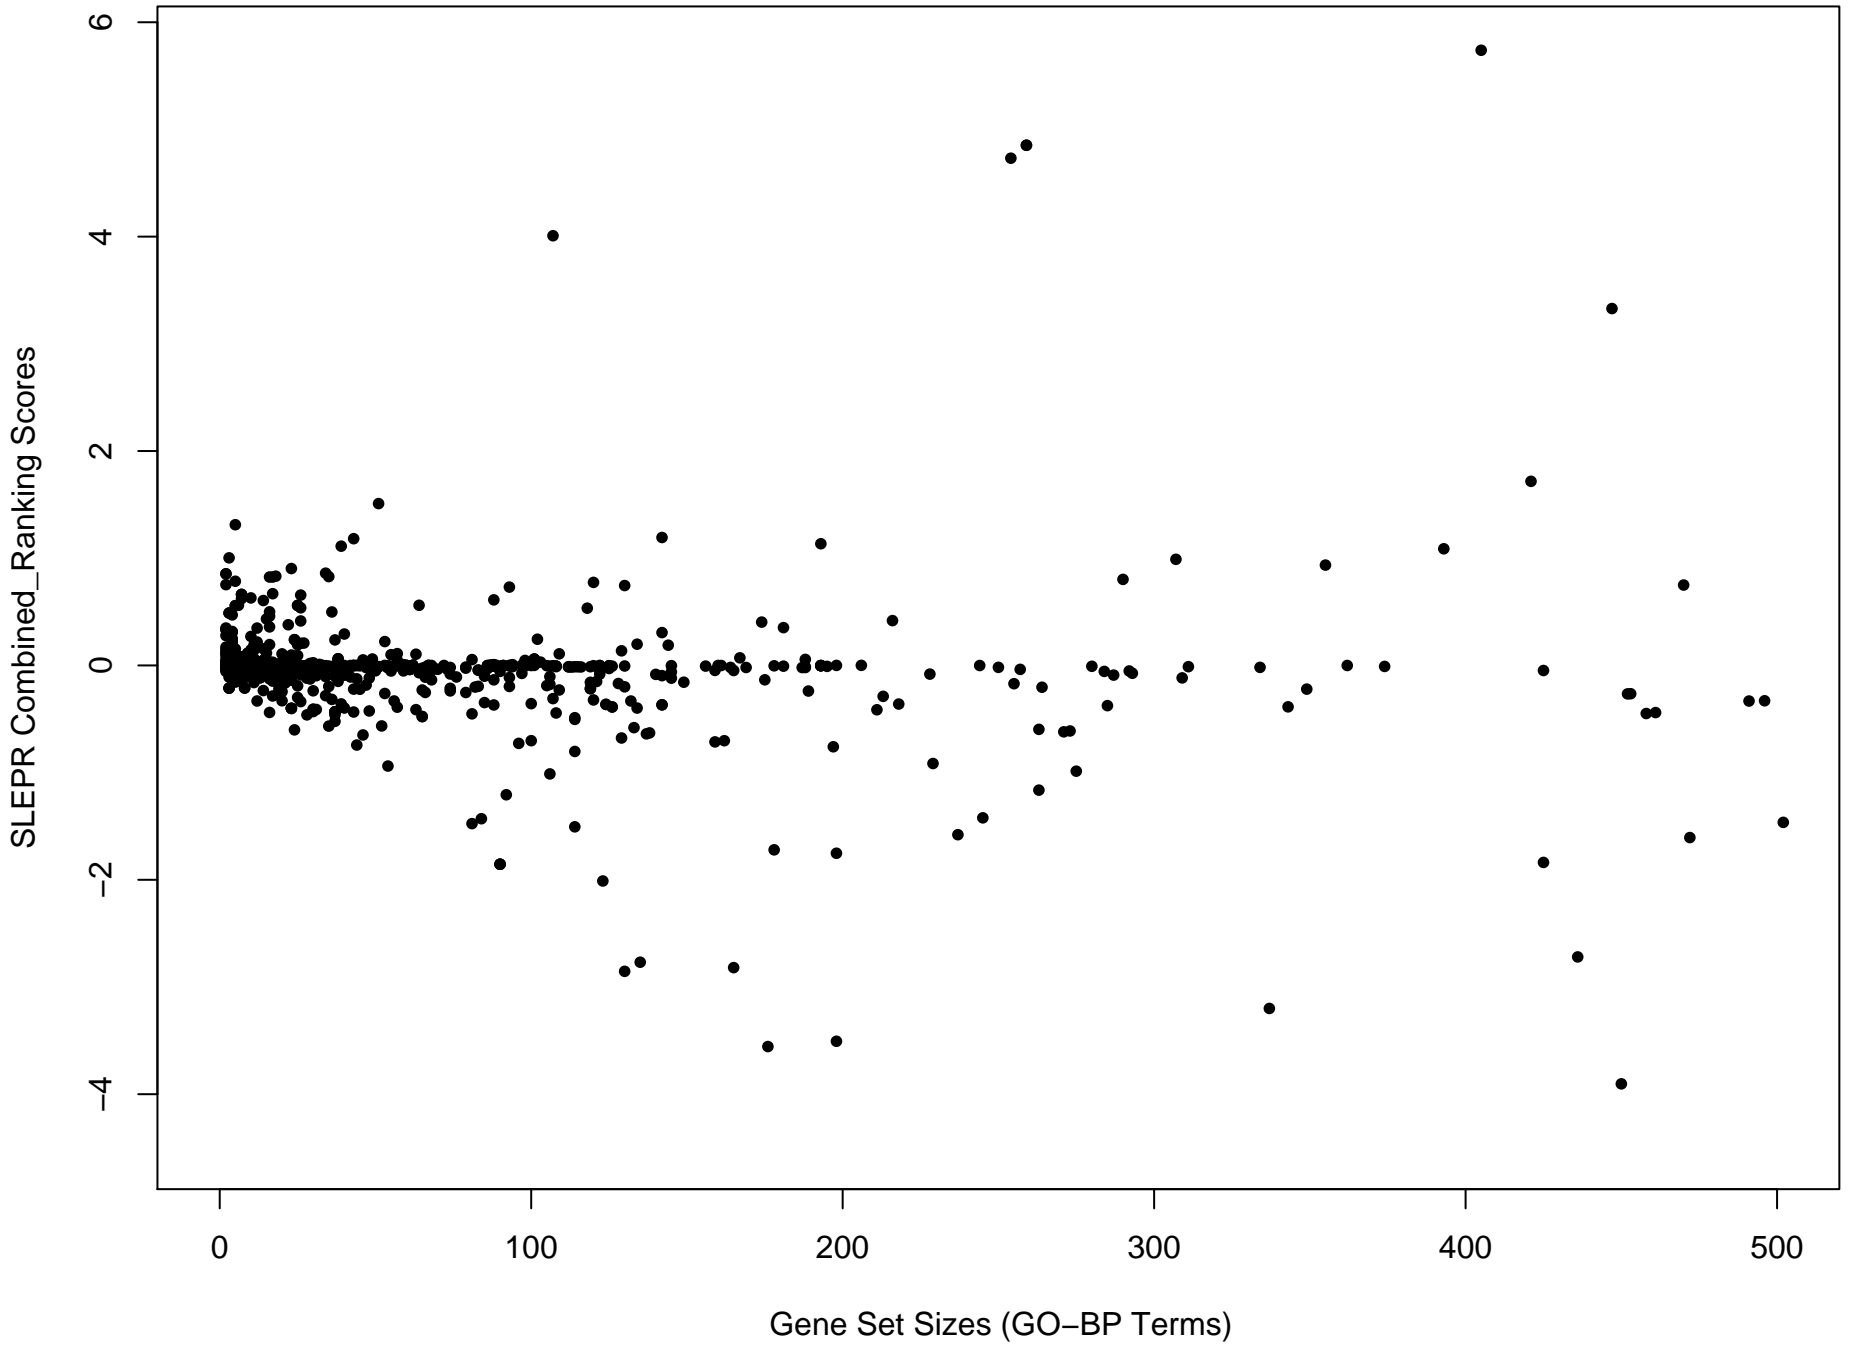



Distribution of SLEPR pathway ranking scores vs gene set sizes for data in TableS6 (size: 0–200)

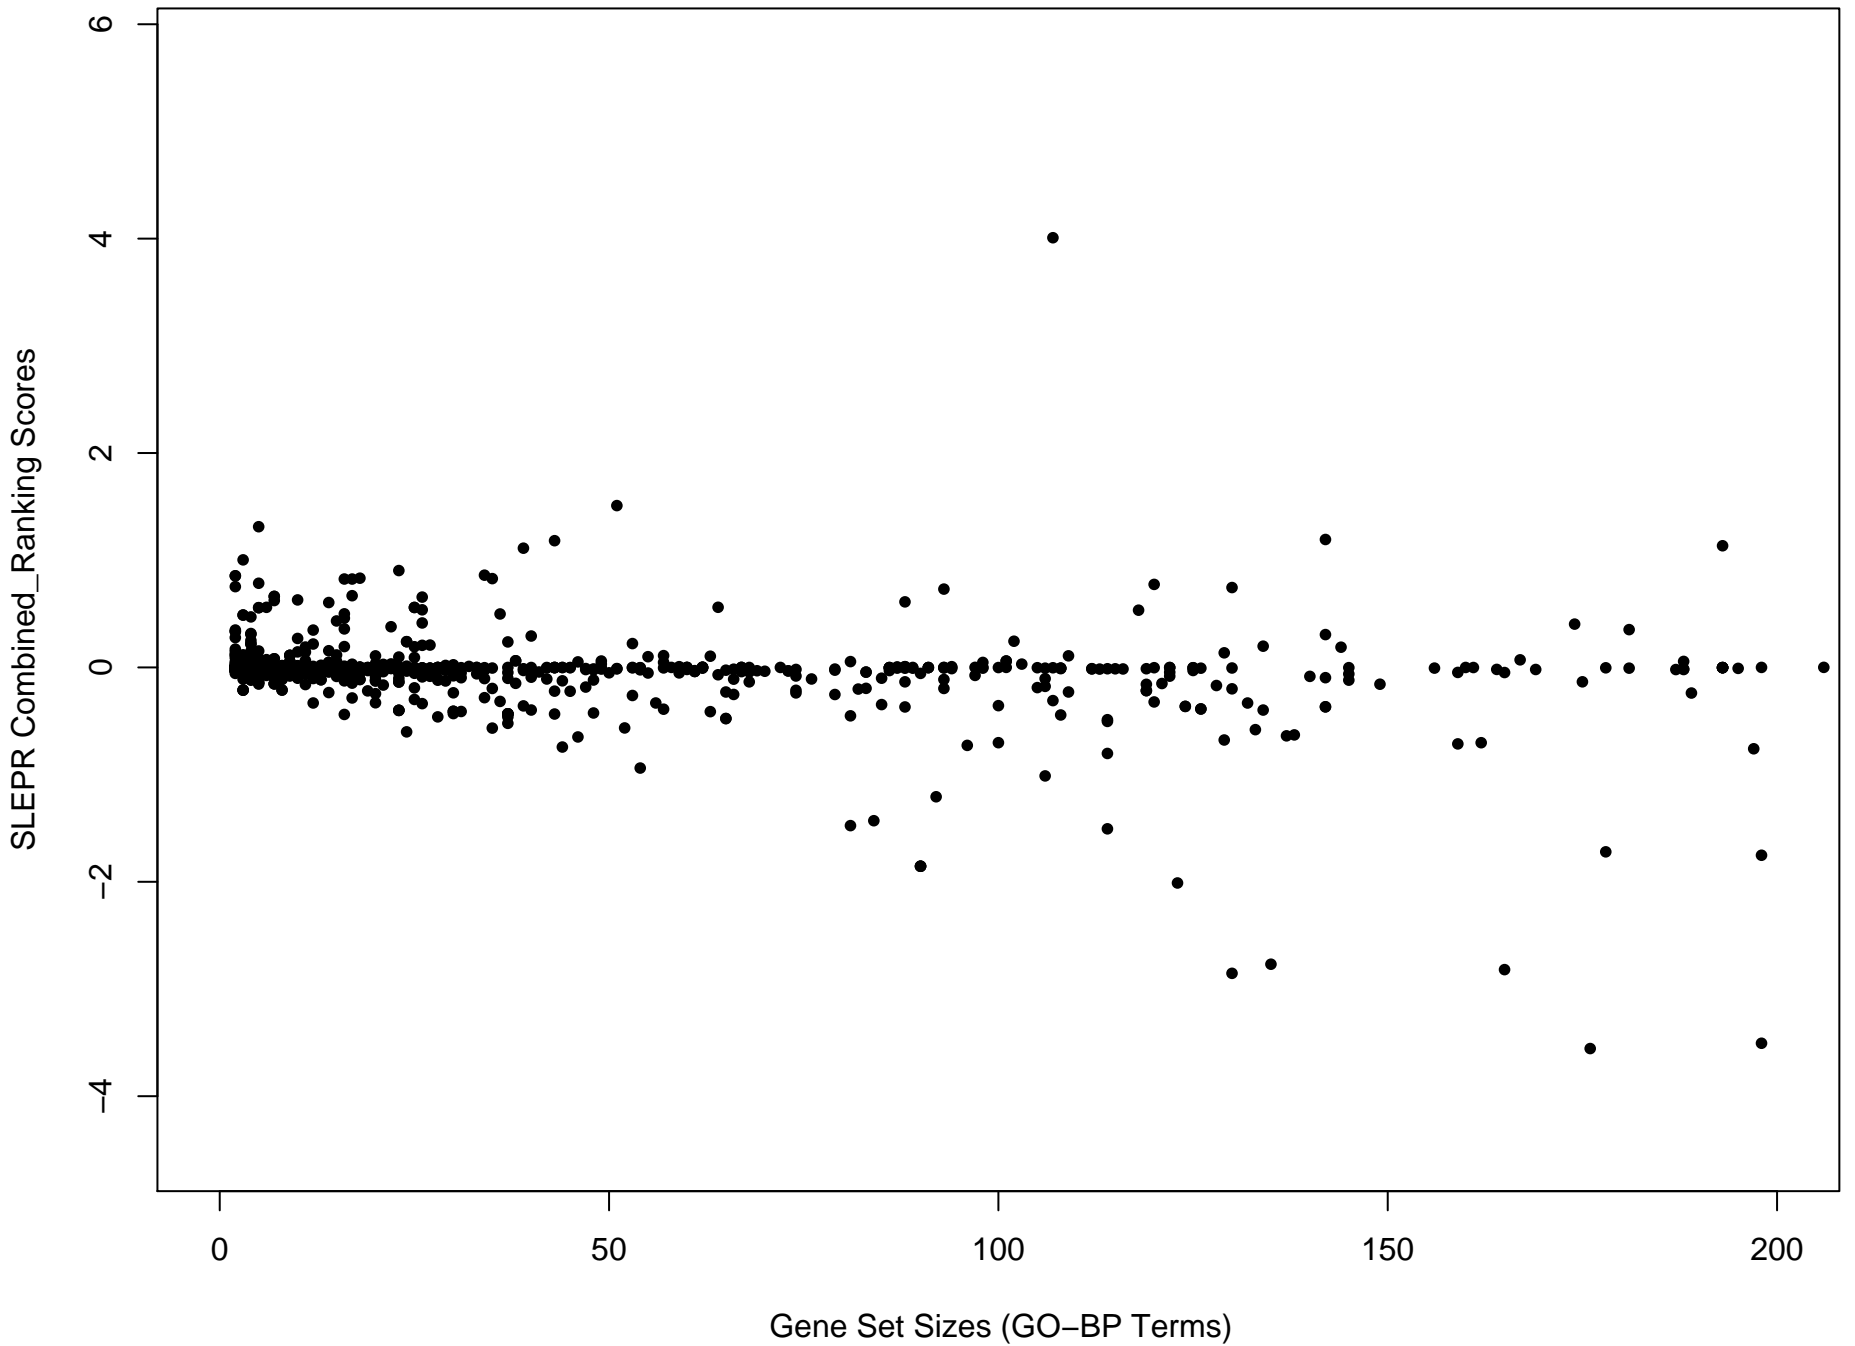

**Histogram distribution of gene set sizes for terms in TableS6**

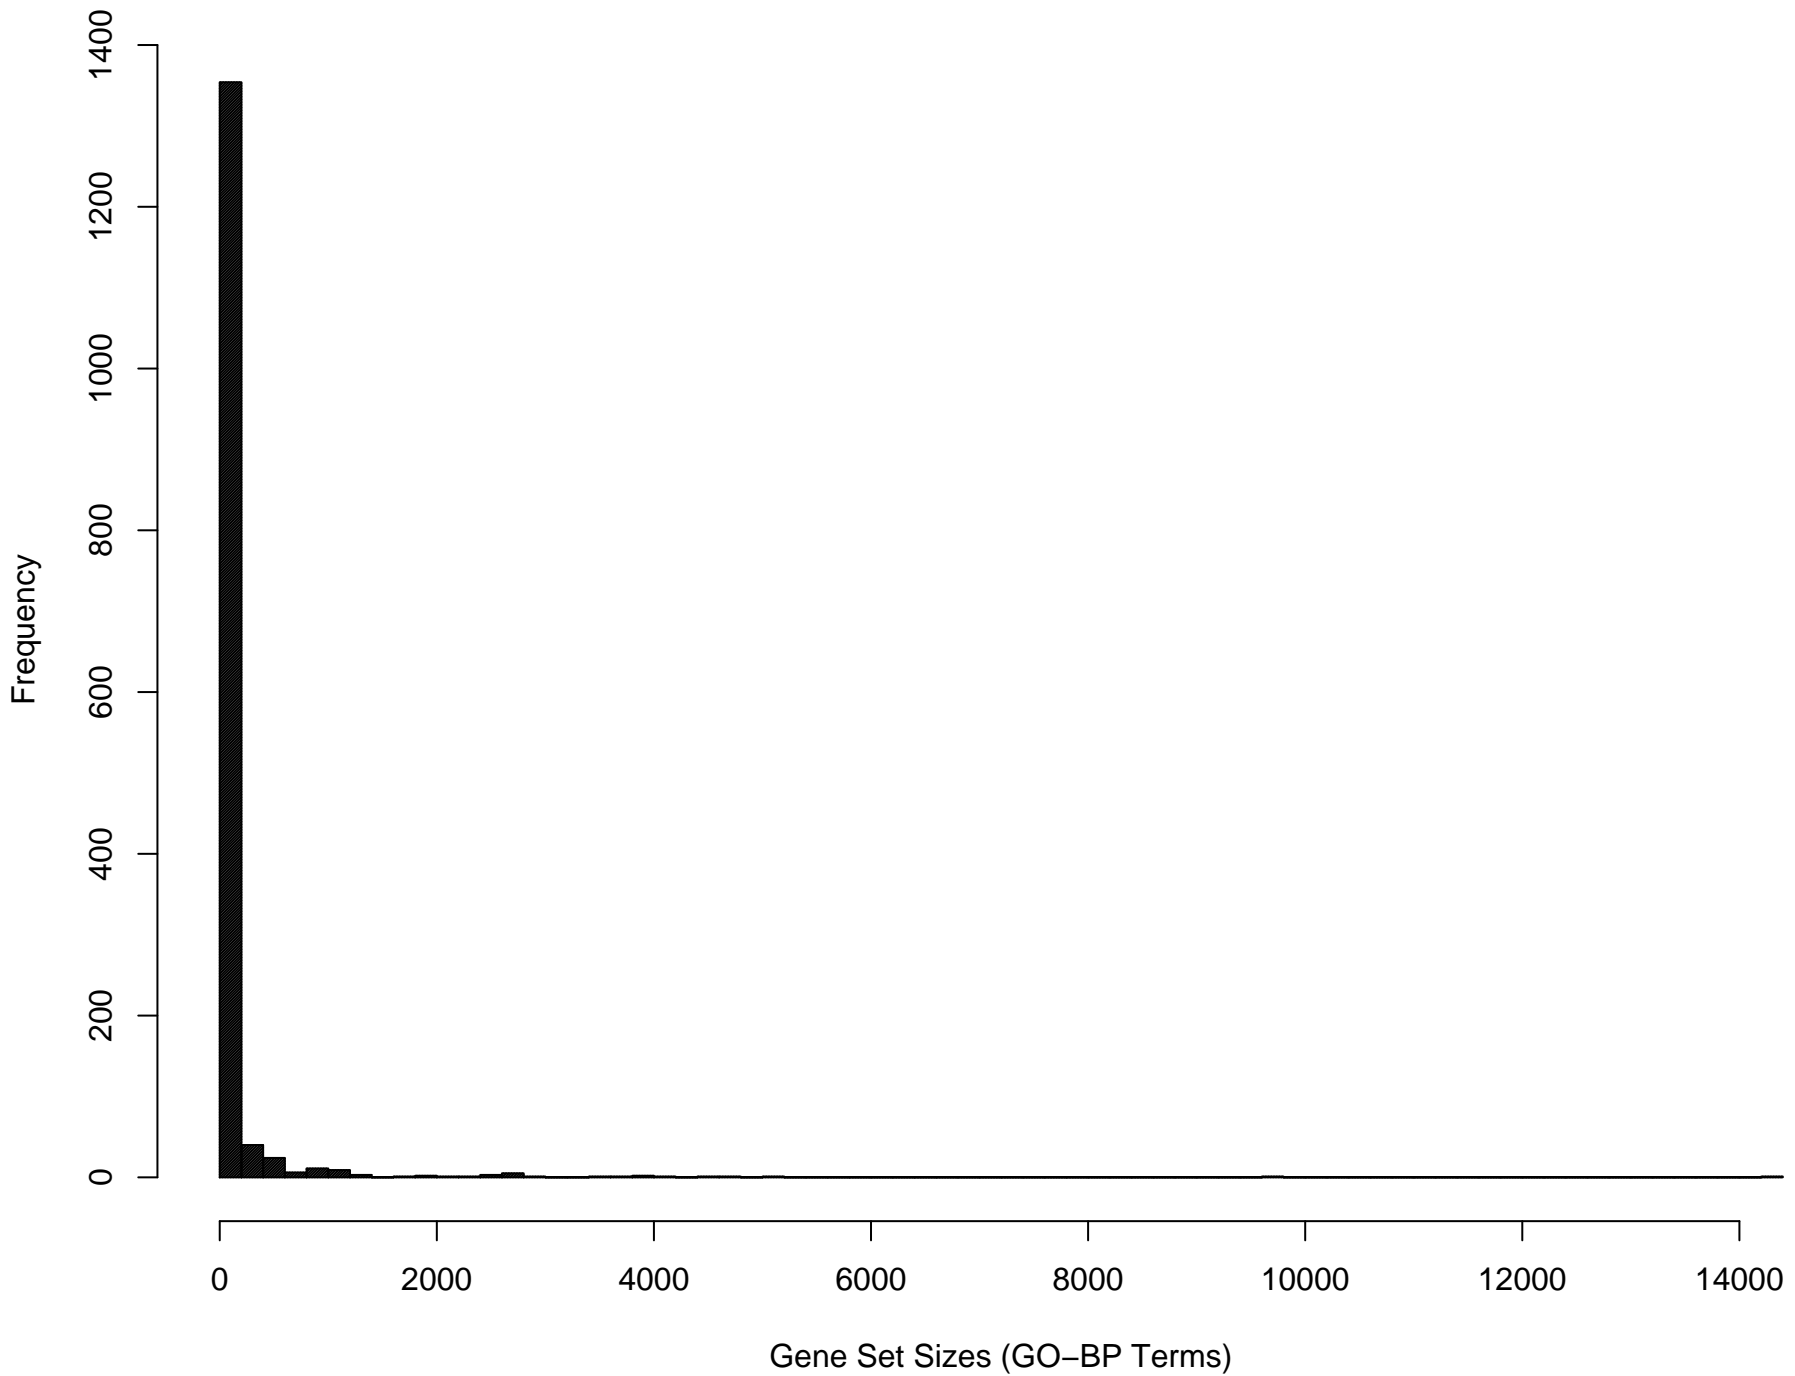

**Histogram distribution of gene set sizes for terms in TableS6 (top 100 ranked terms)**

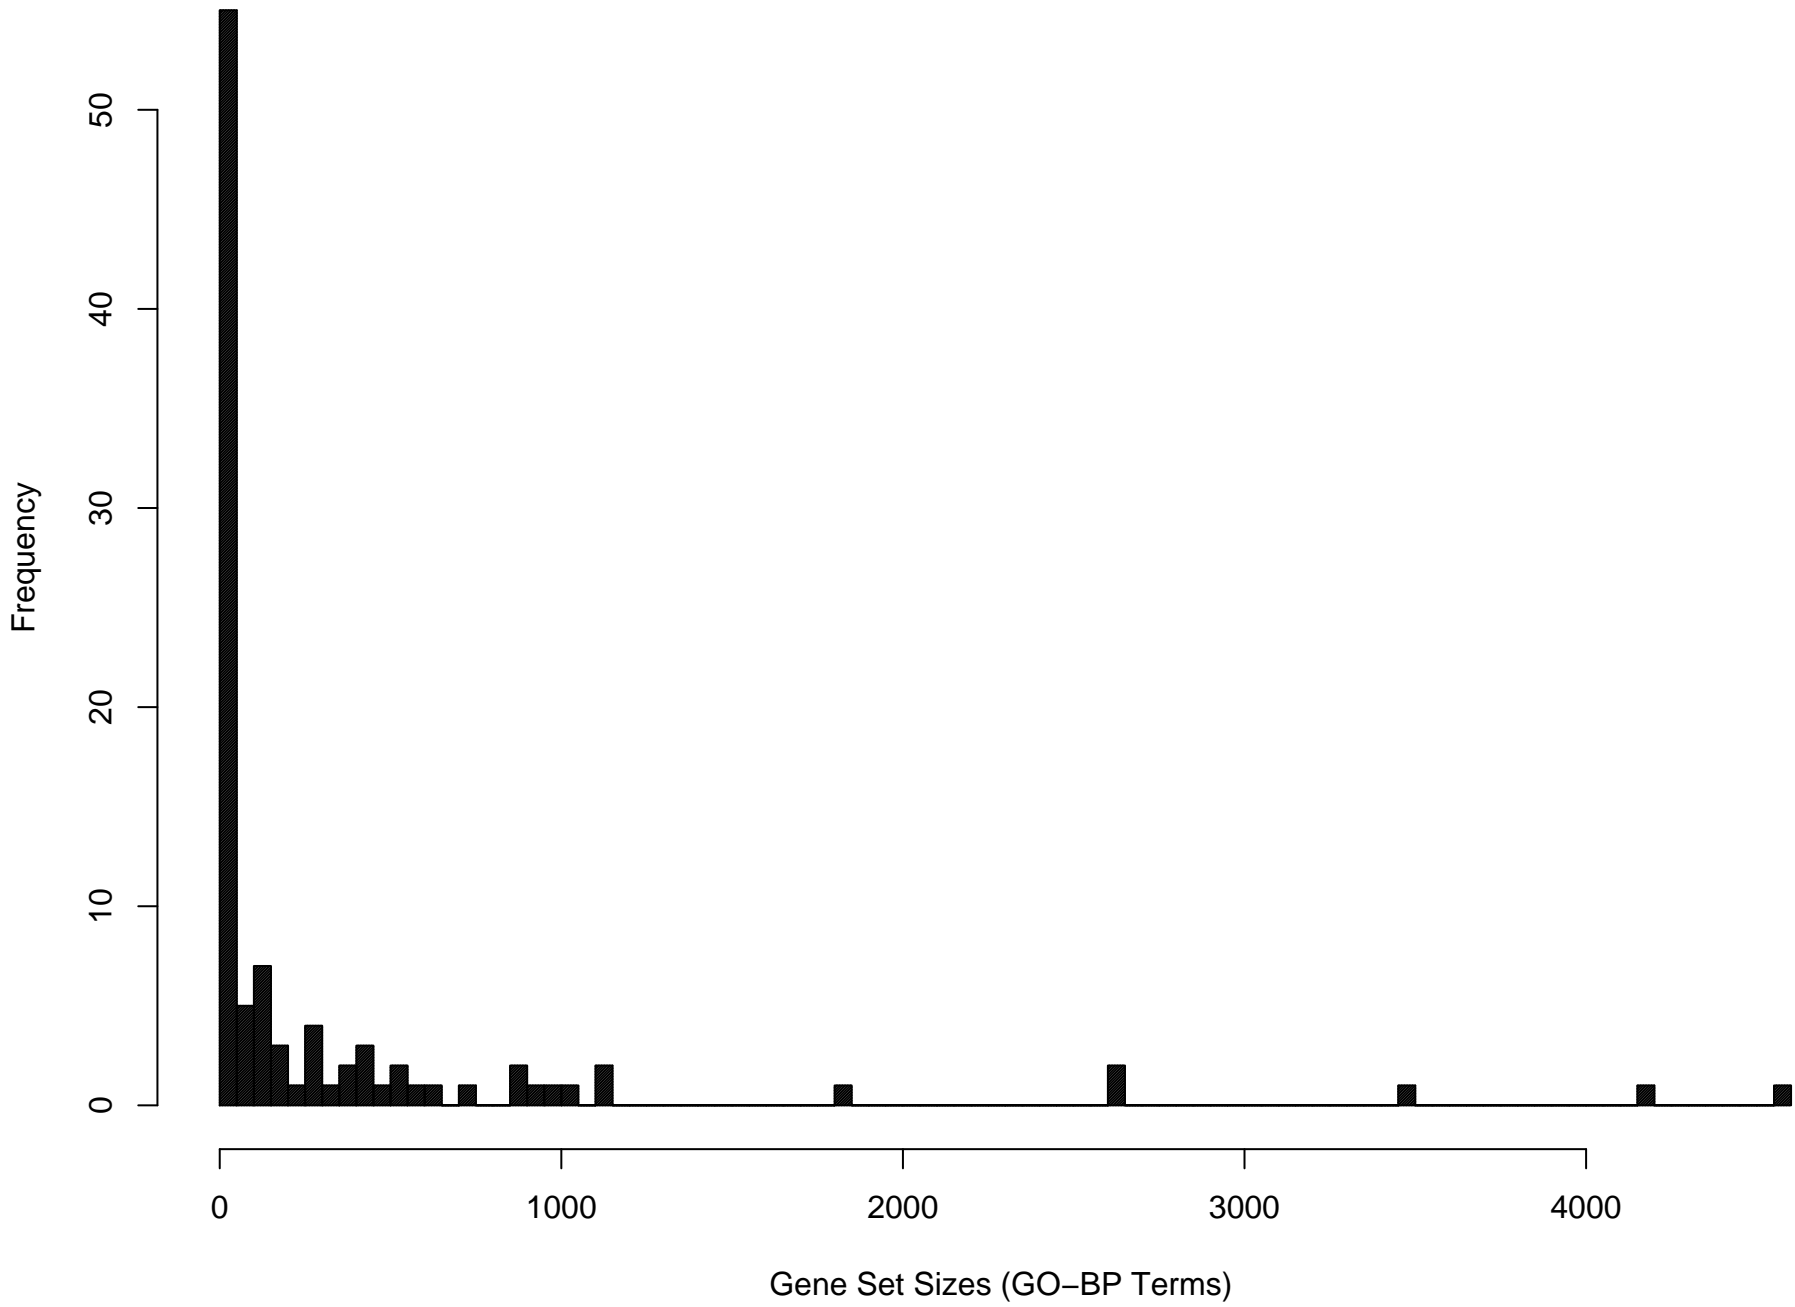

**Histogram distribution of gene set sizes for terms in TableS6 (top 50 ranked terms)**

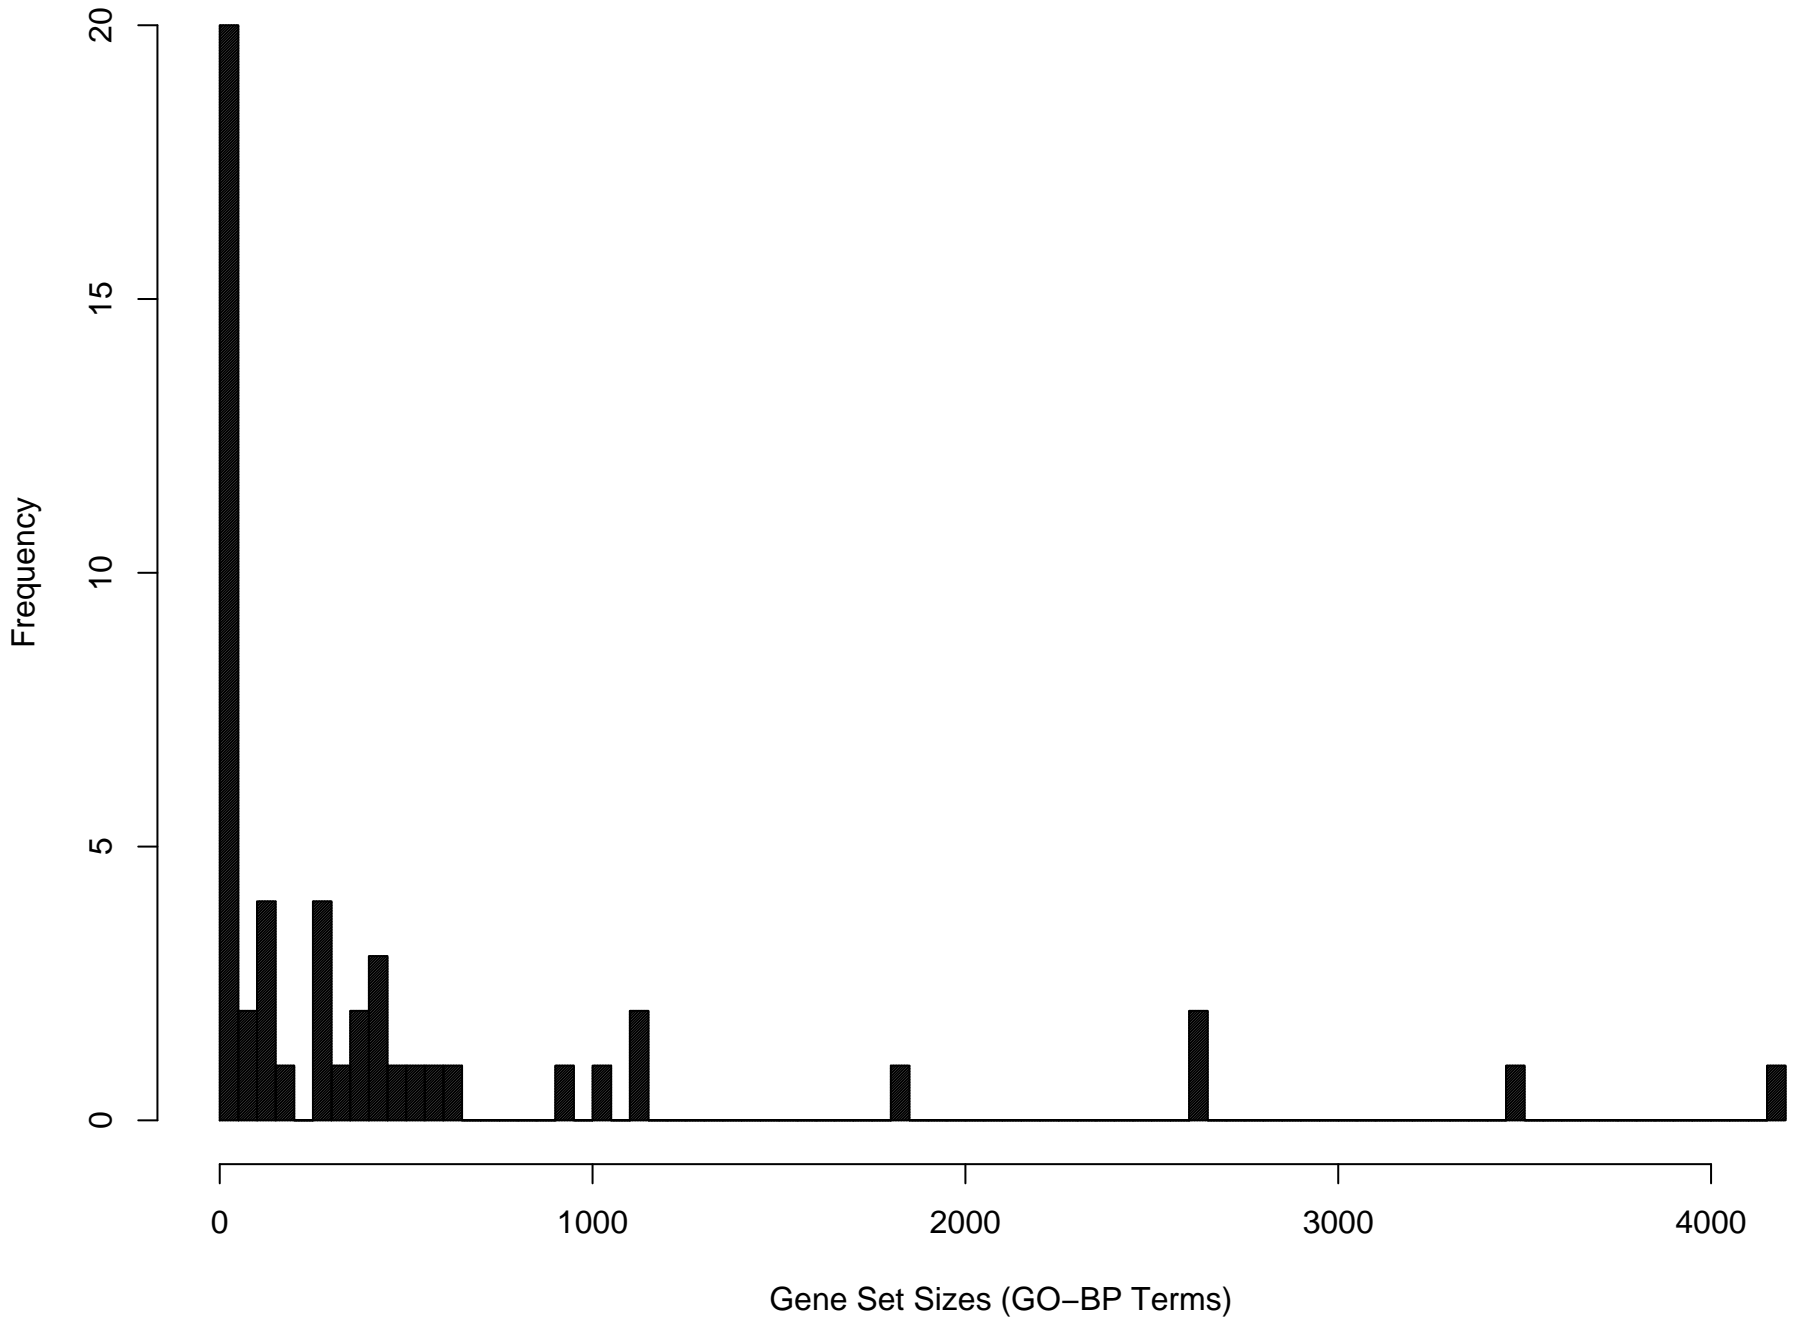

**Histogram distribution of gene set sizes for terms in TableS6 (top 10 ranked terms)**

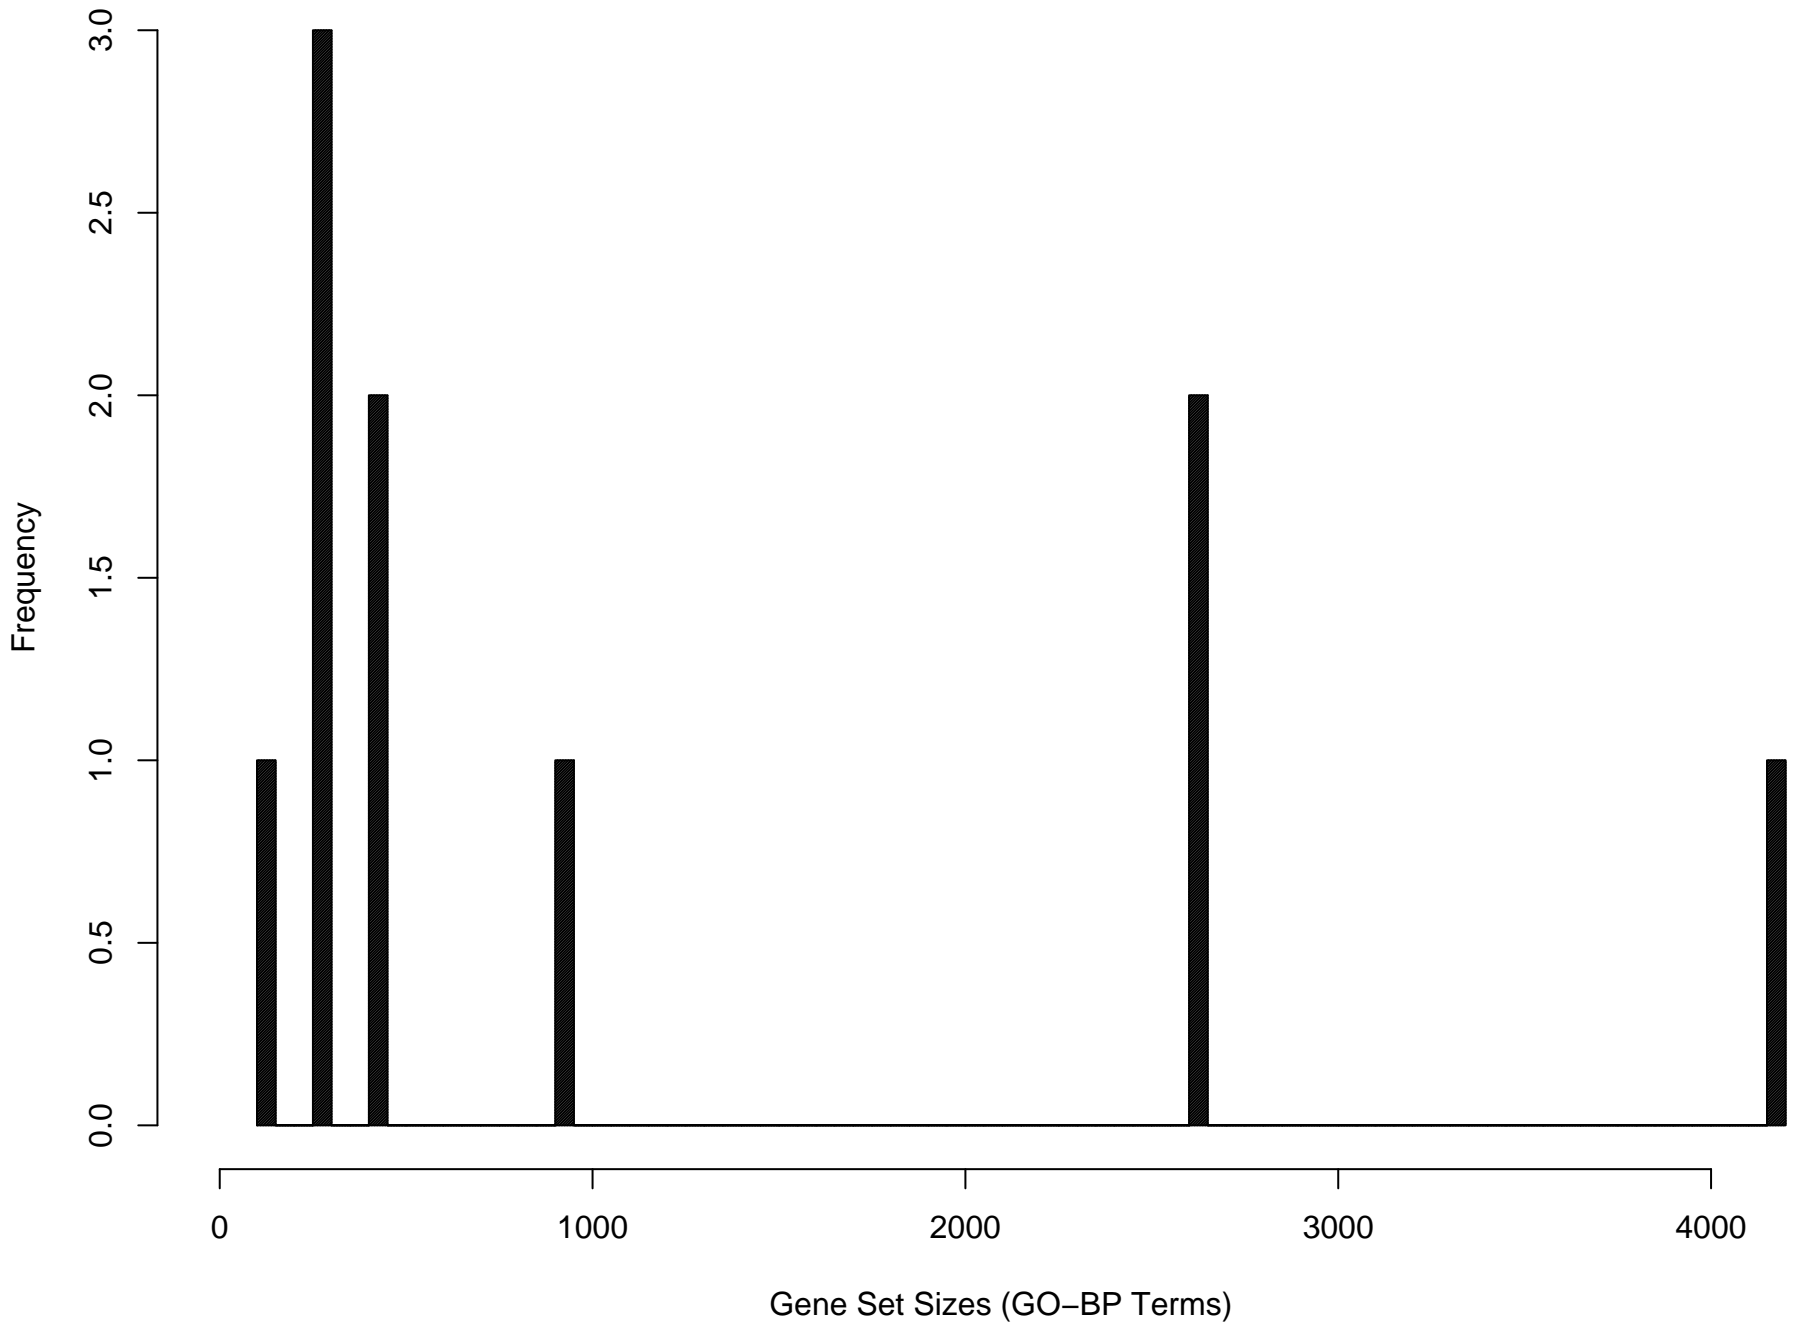

Supplement: pone.0003288.s004.pdf [file pone.0003288.s004.pdf]
